1 **FOXC2 marks and maintains the primitive spermatogonial stem**  
2 **cells subpopulation in the adult testis**

3 Zhipeng Wang<sup>1,3</sup>, Cheng Jin<sup>1,3</sup>, Pengyu Li<sup>1</sup>, Yiran Li<sup>1</sup>, Jielin Tang<sup>1</sup>, Zhixin Yu<sup>1</sup>, Tao Jiao<sup>1</sup>,  
4 Jinhuan Ou<sup>1</sup>, Han Wang<sup>1</sup>, Dingfeng Zou<sup>1</sup>, Mengzhen Li<sup>1</sup>, Xinyu Mang<sup>1</sup>, Jun Liu<sup>1</sup>, Yan Lu<sup>1</sup>,  
5 Kai Li<sup>1</sup>, Ning Zhang<sup>2</sup>, Shiyong Miao<sup>1</sup>, Jia Yu<sup>1</sup>, Linfang Wang<sup>1</sup> and Wei Song<sup>1\*</sup>

6 <sup>1</sup> Department of Biochemistry and Molecular Biology, State Key Laboratory of Medical  
7 Molecular Biology, Institute of Basic Medical Sciences Chinese Academy of Medical  
8 Sciences, School of Basic Medicine Peking Union Medical College; Beijing, 100005, China.

9 <sup>2</sup> Wellcome Centre for Anti-Infectives Research, Division of Biological Chemistry and Drug  
10 Discovery, School of Life Sciences, University of Dundee; Dundee, DD1 5EH, UK.

11 <sup>3</sup>These authors contributed equally: Zhipeng Wang, Cheng Jin.

12 \* Correspondence: Wei Song

13

14 **Email:** [songwei@ibms.pumc.edu.cn](mailto:songwei@ibms.pumc.edu.cn)

15 **Author Contributions:** W.S., Z.W. and C.J. conceived and designed the study; Z.W. and C.J.  
16 performed most of the experiments and analyzed data with the help of P.L., Y.L., and J.T.;  
17 Z.Y., T.J., J.O., H.W., D.Z., M.L., X.M., J.L., Y.L., and K.L. provided additional experimental  
18 support; J.Y., N.Z., S.M. and L.W. provided critical suggestions on manuscript preparation;  
19 W.S., Z.W., and C.J. wrote the manuscript with help from all authors.

20 **Competing Interest Statement:** The authors declare that they have no competing interests.

21 **Classification:** BIOLOGICAL SCIENCES and Developmental Biology

22 **Keywords:** FOXC2; Spermatogonial stem cells; quiescent

23 **This PDF file includes:**

24 Main Text

25 Figures 1 to 7

26 Supplemental Figures S1 to S6

27 Captions for Supplemental Tables S1 to S4

28 Supplemental Materials and Methods

29

30

## 31 Abstract

32 In adult mammals, spermatogenesis embodies the complex transition from spermatogonial stem  
33 cells (SSCs) to spermatozoa. This process is initiated by the dynamic transition among a series of  
34 SSCs subpopulations. However, it remains elusive and controversial for the identity of the primitive  
35 adult SSCs at the top of this developmental hierarchy. Using single-cell analysis and lineage  
36 tracing, we identified forkhead box protein C2 (FOXC2) as a specific marker for the primitive SSCs  
37 subpopulation in adult mice and humans. During homeostasis, FOXC2<sup>+</sup>-SSCs can initiate  
38 spermatogenesis, and through which give rise to all sets of spermatogenic progenies. Specific  
39 ablation of the FOXC2<sup>+</sup>-SSC results in depletion of the undifferentiated spermatogonia pool. During  
40 germline regeneration, spermatogenesis can be completely restored by FOXC2<sup>+</sup>-SSCs. Germ cell-  
41 specific *Foxc2* knockout resulted in accelerated exhaustion of SSCs and eventually led to male  
42 infertility. Mechanistically, FOXC2 is required for maintaining the quiescent state of the primitive  
43 SSCs by promoting the expression of negative regulators of cell cycle phase transition. Overall,  
44 this work proposed FOXC2<sup>+</sup>-SSCs as an indispensable and primitive subgroup during homeostasis  
45 and regeneration in the adult testis.

## 46 Introduction

47  
48 Through spermatogenesis, spermatozoa are generated from spermatogenic cells that are  
49 originated from spermatogonial stem cells (SSCs). It is critical for this process to be continuous and  
50 successful that SSCs are maintained in a homeostatic balance between self-renewal and  
51 differentiation (1). The SSCs, as the least differentiated spermatogonia, belong to a subgroup of  
52 undifferentiated spermatogonia (uSPG) that are morphologically categorized into three subtypes,  
53 i.e.,  $A_{\text{single}}$  ( $A_s$ ),  $A_{\text{paired}}$  ( $A_{\text{pr}}$ ), and  $A_{\text{aligned}}$  ( $A_{\text{al}}$ ) cells (2). So far, three models have been proposed for  
54 the mechanism underlying SSCs' self-renew based on the dynamic transitions among subgroups.  
55 In the ' $A_s$  model',  $A_s$  spermatogonia serve as SSCs that are capable of both self-renew and further  
56 transformation into  $A_{\text{pr}}$  and  $A_{\text{al}}$  that eventually give rise to spermatogonia (3, 4). Later, based on the  
57 discovery of *Ngn3* and *Gfra1* as SSCs markers, the 'fragmentation model' suggests all three  
58 subgroups with stem cell potential and the SSCs renewal is achieved through the fragmentation of  
59 pairs and chains (5). Further work on SSCs markers such as *ID4* and *PAX7* inspired the  
60 'hierarchical  $A_s$  model', in which only specific  $A_s$  spermatogonia possess the potential for long-term  
61 self-renewal whereas the majority are restricted in their capacity (6, 7). Though their standing points  
62 of view differ, each model seems well supported by the respective collection of evidence, which to  
63 some extent reflects the nature of heterogeneity and dynamics among SSCs subpopulations.

64  
65 In recent years, great insights into SSCs behaviors and regulations have been provided by a  
66 body of pioneer works, especially with recent advances in single-cell gene-expression profiling,  
67 highlighting great heterogeneity of SSCs and focusing on characterizing the nature of SSCs states  
68 especially for seeking the primitive subgroup among them. Within the population of uSPG, a  
69 number of genes relatively higher expressed in primitive subfractions have been identified and well  
70 investigated, i.e., *Gfra1*, *ID4*, *Ret*, *Eomes*, *Pax7*, *Nanos2*, *Shisa6*, *T*, *Pdx1*, *Lhx1*, *Egr2* and *Plvap*  
71 (5-15). Particularly, *Gfra1*, *ID4*, *Eomes*, *Pax7*, *Nanos2*, and *Plvap* are further validated as the SSCs  
72 markers through lineage tracing experiment, which is considered to be a reliable method to study  
73 the origin and development of stem cells. However, some essential and primitive sub-populations

74 remain undiscovered, and the identification of which is of great significance for elucidating the  
75 developmental process of SSCs renewal and its behavior in testis.

76 Adult stem cells (ASCs), as the undifferentiated primitive cells that can be found in nearly all  
77 types of tissues in mammals, are characteristic for a unique quiescent status reflected by both  
78 reversible cell cycle arrest and specific metabolic alterations (16). Putative the primitive SSCs  
79 subgroups appear to share this characteristic, as revealed in recent single-cell RNA-sequencing  
80 (scRNA-seq) analysis in humans and mice, being largely non-proliferative while capable of  
81 reciprocating between the quiescent and activated status (17-21). However, rigorous biological  
82 validation of these populations is lacking through live imaging or genetic lineage tracing, or other  
83 means. On the other hand, cells in a quiescent state are supposed to be more resilient to genotoxic  
84 insults, which shall enable the primitive SSCs to sufficiently restore spermatogenesis upon such  
85 disturbance.

86 Here, we identified a subpopulation of adult SSCs specifically marked by forkhead box protein  
87 C2 (FOXC2). In adult mice, spermatogenic cells derived from the FOXC2<sup>+</sup> population were able to  
88 complete the whole spermatogenesis. Upon the loss of this specific subpopulation of SSCs, the  
89 undifferentiated spermatogonia pool was exhausted, eventually leading to defective  
90 spermatogenesis. Specifically, FOXC2 is required for maintaining SSCs quiescence by promoting  
91 the expression of negative regulators of cell cycle phase transition, thus symbolizing the primitive  
92 state of these adult SSCs. Moreover, the FOXC2<sup>+</sup> population endured the chemical insult with  
93 busulfan and effectively restored spermatogenesis, thereby critical for keeping the reproductive  
94 homeostasis in male adult mice. Thus, our results demonstrate that FOXC2 marks the primitive  
95 SSCs subpopulation in the adult testis, and is also required for the homeostasis and regeneration  
96 of SSCs.

97 **Results**

98

99

**Identification of FOXC2<sup>+</sup>-SSCs as the quiescent and developmental starting point of adult uSPG.** We performed single-cell RNA-seq (10x genomics) of the uSPG from adult mice testes marked by THY1, a widely recognized surface marker for uSPG with self-renewing and transplantable state (22, 23), to dissect the heterogeneity and developmental trajectory (Fig.1A, Fig. S1A, B). Among 5 distinct clusters identified, Cluster1 was characterized by the high expression of stemness markers whereas other clusters were featured by progenitor or differentiating spermatogonia (dSPG) markers (Fig.1B, Fig. S1C, D). Primarily mapped to the extreme early point of the developmental trajectory, Cluster1 cells appeared quiescent and likely represented the primitive state of uSPG populations (Fig.1B, Fig. S1E-G). The top10 differentially expressed genes (DEGs) associated with Cluster1 are featured by SSCs markers such as *Mcam* (24), *Gfra1* (5), *Tcl1* and *Egr2* (12, 18) (Fig.1C, Fig. S2A, Supplemental Table S1) in addition to six others expressed in different stages of germ cells and/or somatic cells, in which only FOXC2 was exclusively localized in the nucleus of a subgroup of ZBTB16<sup>+</sup> uSPG (25, 26) in mice (Fig. 1D, Fig. S2B). More specifically, in adult mice, FOXC2 displayed differential expressions among various subtypes of uSPG, being more specific in A<sub>s</sub> (59.9%) than other subtypes including A<sub>pr</sub> (5.2%), A<sub>pr-1</sub> (4.1%), A<sub>al4-1</sub> (1.83%), A<sub>al8-1</sub> (1.5%), and A<sub>al16-1</sub> (1.67%) (Fig. 1E). There was only a small fraction (5.1%) was active in proliferation as indicated by MKI67 (Fig. 1F), suggesting that FOXC2<sup>+</sup> cells are primarily quiescent. Additionally, when examining the SSCs markers validated previously by lineage tracing (27), we found that FOXC2 displays a higher level of co-localization with GFRA1 and EOMES than PAX7 and NEUROG3 (28), indicating the FOXC2<sup>+</sup> cells contain but differ from the known SSCs subsets (Fig. 1G).

120

121

122

123

124

125

126

127

128

129

We next analyzed the expression of FOXC2 in adult human testis using the published scRNA-seq dataset (17) (GSE112013). As expected, FOXC2 was also specifically expressed in the human SSCs, most of which were MKI67<sup>-</sup> (Fig. 1H, Fig.S2C). Pseudotime analysis showed that the FOXC2<sup>+</sup> cells located at the start of the developmental trajectory with a proportion of about 90% that were MKI67<sup>-</sup> (Fig. 1I). Immunofluorescence staining confirmed that FOXC2<sup>+</sup> cells were a subset of ZBTB16<sup>+</sup> spermatogonia in adult human testis, and most of them were MKI67<sup>-</sup> (Fig. 1J), possibly representing the A<sub>dark</sub> SSCs also known as the reserve stem cells or 'true SSC' in human testis(29-33). These results suggested that FOXC2 was similarly expressed in the SSCs of adult human and mouse testis and may possess a conserved function.

130

131

132

133

134

135

136

137

138

139

140

**FOXC2<sup>+</sup>-SSCs can sufficiently initiate and sustain spermatogenesis.** We generated *Foxc2*<sup>CRE/+</sup>;*R26T/G<sup>fl</sup>* mice in which FOXC2<sup>+</sup> cells were specifically labeled with GFP to enable the progeny tracing after tamoxifen treatment (Fig. S3A) (34). Tamoxifen was introduced at 2-month of age, after which the FOXC2-expressing lineage (GFP<sup>+</sup>) was tracked at d3 (day3), w1 (week1), w2, w4, w6, m4 (month4), m7, and m12 respectively (Fig. 2A). At d3, the tracked cells were both GFP<sup>+</sup> and FOXC2<sup>+</sup> (Fig. 2B) and constituted 0.027% of the total testicular cells as indicated by the fluorescence-activated cell sorting (FACS) analysis (Fig. 2C). FACS-sorted GFP<sup>+</sup> cells were then transplanted into testes of recipient mice pre-treated with busulfan, in parallel to THY1<sup>+</sup> cells derived from *eGFP*<sup>Tg/+</sup> mice as control. Two months after transplantation, FOXC2<sup>+</sup> cells generated 5 times greater number of colonies than the THY1<sup>+</sup> control (Fig. 6D, E), indicating that the FOXC2<sup>+</sup> cells possess higher stemness as convinced by stronger transplantable viability.

141

142

143

At w1, all GFP<sup>+</sup> cells were identified as uSPGs, encompassing A<sub>s</sub>, A<sub>pr</sub>, and A<sub>al-4</sub> (Fig. 2F<sub>a</sub>). Specifically, FOXC2<sup>+</sup> A<sub>s</sub> gave rise to 3 types of A<sub>pr</sub>, i.e., FOXC2<sup>+</sup>/FOXC2<sup>+</sup>, FOXC2<sup>+</sup>/FOXC2<sup>-</sup>, and FOXC2<sup>-</sup>/FOXC2<sup>-</sup> (Fig. 2F<sub>c1, b, c2, d2</sub>), which then either produced FOXC2<sup>+</sup> or FOXC2<sup>-</sup> A<sub>s</sub> through



144 symmetric or asymmetric division (Fig. 2F<sub>c3</sub>, d<sub>1</sub>, f<sub>1</sub>), or developed into A<sub>ai</sub> with no more than one  
145 FOXC2<sup>+</sup> cell in the chains (Fig. 2F<sub>e</sub>, f<sub>2</sub>). These results confirmed that FOXC2<sup>+</sup> cells were capable  
146 of self-renewal to sustain the population as well as replenishing the uSPG pool by producing  
147 downstream progenies, thereby serving as primitive SSCs. In the following 2-6 weeks, GFP<sup>+</sup>  
148 colonies further expanded and produced GFP<sup>+</sup> sperms in the epididymis, from which healthy GFP<sup>+</sup>  
149 offspring were given birth by C57 female recipients (Fig. 2G). The GFP<sup>+</sup> colonies constituted  
150 83.67%, 90.48%, 96.78%, 98.55%, and 99.31% of the total length of the seminiferous tubules at  
151 w6, m2, m4, m7, and m12 respectively (Fig. 2H, I). All offspring were GFP<sup>+</sup> from m4 onwards (Fig.  
152 2J). Additionally, the EOMES<sup>+</sup>, GFRA1<sup>+</sup> and PAX7<sup>+</sup> cells were all GFP<sup>+</sup> at w2, further confirming  
153 these progenies were derived from the FOXC2<sup>+</sup> cells (Fig. 2K). Overall, FOXC2<sup>+</sup>-SSCs can produce  
154 all subtypes of uSPG, thus initiating spermatogenesis in adult mice.

155

156 **Specific ablation of the FOXC2<sup>+</sup>-SSC results in depletion of the uSPG pool.** We then prepared  
157 *Foxc2<sup>Cre/+</sup>;R26<sup>DTA/+</sup>* mice to investigate the physiological requirement of FOXC2<sup>+</sup>-SSCs in  
158 spermatogenesis (34). FOXC2<sup>+</sup> population in 2-month-old mice was specifically ablated with  
159 tamoxifen-induced diphtheria toxin (DTA). The testes of these mice were examined at day3, day7,  
160 and day14 post tamoxifen induction (Fig. 3A). Gradual loss of weight in testes coincided with the  
161 reduction in the size of testes in all the mice while body weight was maintained (Fig. 3B, C).  
162 Specifically, at d3, there were no detectable FOXC2<sup>+</sup> cells in addition to the decrease in the number  
163 of GFRA1<sup>+</sup>, LIN28A<sup>+</sup> (35) and ZBTB16<sup>+</sup> uSPG at the basement membrane of seminiferous tubules;  
164 at d14, all GFRA1<sup>+</sup>, LIN28A<sup>+</sup> and ZBTB16<sup>+</sup> uSPG disappeared while vacuoles formed at the  
165 basement membrane with remaining spermatocytes and spermatids in the seminiferous lumen  
166 (Fig. 3D–F, Fig. S3B). Meanwhile, the expression of DDX4 (36) and DAZL (37) as germ cell  
167 markers was significantly reduced along with nearly undetectable expression of uSPG markers  
168 such as ZBTB16, LIN28A, GFRA1, RET, and NEUROG3 (28) (Fig. 3G). These results indicate an  
169 uSPG exhaustion as the result of the FOXC2<sup>+</sup>-SSCs ablation, therefore supporting the critical role  
170 in spermatogenesis played by FOXC2<sup>+</sup> population.

171

172 **FOXC2<sup>+</sup>-SSCs are resilient to genotoxin and indispensable for germline regeneration.** Next,  
173 we examined the regenerative viability of FOXC2<sup>+</sup>-SSCs. At d20 post busulfan treatment  
174 (20mg/kg), FOXC2<sup>+</sup> cells constituted the majority of uSPGs (Fig. 4A). Following a sharp decrease  
175 in cell number in the first five days, ZBTB16<sup>+</sup> and GFRA1<sup>+</sup> cells began to recover from d25 while  
176 the number of FOXC2<sup>+</sup> cells remained stable (Fig. 4B), indicating that this population is insensitive  
177 to busulfan. We then checked changes in the proportion of MKI67<sup>+</sup> cells, active in proliferation, in  
178 FOXC2<sup>+</sup> population after busulfan treatment (Fig. 4C, D). At d30, the MKI67<sup>+</sup> proportion rose to  
179 15.92%, indicating a higher level of proliferation, albeit the total cell number stayed static (Fig. 4B,  
180 D), thereby becoming the driving force in restoring spermatogenesis. Up to d120, the MKI67<sup>+</sup>  
181 proportion had settled gradually back to the pre-treatment level, accompanied by the full recovery  
182 of spermatogenesis (Fig. 4D). Further details of this process were revealed during lineage tracing  
183 (Fig. 4E). Three days after tamoxifen induction, the 2-month-old *Foxc2<sup>CRE/+</sup>;R26T/G<sup>ff</sup>* mice were  
184 treated with busulfan. Consistent with the results above, at d20, the survived uSPG were  
185 predominantly GFP<sup>+</sup> (Fig. 4F). Over 68.5% of the total length of the seminiferous tubules were GFP<sup>+</sup>  
186 at m2, and this proportion rose to 95.43%, 98.41%, and 99.27% at m4, m7, and m12 respectively  
187 (Fig. 4G, H), which was comparable to the proportion by tamoxifen induction alone (Fig. 2I). From  
188 m4 onwards, nearly all germ cells, spermatids, and their offspring were GFP<sup>+</sup> (Fig. 4G, I). Together,

189 these results confirmed that FOXC2<sup>+</sup>-SSCs are indispensable for germline regeneration that is  
190 central to spermatogenesis recovery from interruptions.

191

192 **FOXC2 is essential for SSCs maintenance in adult mice.** We then focused on dissecting  
193 FOXC2's role in the SSCs maintenance using *Foxc2*<sup>f/f</sup>;*Ddx4*-cre mice (38) (Fig. 5A). No significant  
194 difference was observed in the expressions of various uSPG markers, including ZBTB16 and  
195 LIN28A, between *Foxc2*<sup>f/f</sup>; *Ddx4*-cre and *Foxc2*<sup>f/+</sup> mice at the age of 1 week (Fig. S4B). However,  
196 adult *Foxc2*<sup>f/f</sup>;*Ddx4*-cre mice displayed clear testis weight loss without significant body weight loss  
197 (Fig. 5B, C). Moreover, in these mice, we observed severe degeneration of seminiferous tubules,  
198 reduced number of spermatids in the epididymis, and decreased size of the uSPG population with  
199 age (Fig. 5D–G) but without apparent signs of apoptosis (Fig. S5B). The 6-month-old *Foxc2*<sup>f/f</sup>;*Ddx4*-  
200 cre mice were infertile, in which over 95% seminiferous tubules were Sertoli-only with hardly  
201 detectable expressions of DAZL, DDX4, LIN28A, and ZBTB16 (Fig. 5D–F, H). Therefore, FOXC2  
202 is essential for maintaining the SSCs homeostasis and normal spermatogenesis in adult mice.

203

204 **FOXC2 maintains the SSCs homeostasis via negative regulation of cell cycle.** We collected  
205 THY1<sup>+</sup> uSPGs from 4-month-old *Foxc2*<sup>f/+</sup> and *Foxc2*<sup>f/f</sup>;*Ddx4*-cre mice and compared their  
206 transcriptome signatures revealed from scRNA-seq (Fig. 6A). The pseudotime analysis identified  
207 Cluster1, which represented the FOXC2-expressing SSCs in *Foxc2*<sup>f/+</sup> mice corresponding to the  
208 FOXC2-deleting SSCs in the *Foxc2*<sup>f/f</sup>;*Ddx4*-cre mice, was specifically assigned to the extremely  
209 early stage of the development trajectory in respective samples, which was validated by the  
210 expression of corresponding markers (Fig. 6B, Fig. S5A, B). Aggregated analysis of the overall  
211 uSPG populations showed that cells derived from *Foxc2*<sup>f/f</sup>;*Ddx4*-cre mice were specifically  
212 associated with the late stage of the development trajectory, as opposed to *Foxc2*<sup>f/+</sup> mice where  
213 nearly all the cells derived were concentrated at the early stage of development (Fig. 6C, Fig. S5C).  
214 This implies that the loss of *Foxc2* prompts the SSCs to progress into a more differentiated stage  
215 with defection in maintaining the primitive identity of SSCs. Further analysis of the cells in Cluster1  
216 revealed two distinct subclusters, i.e., Subclusters0 and Subclusters1 (Fig. S6A). Formed primarily  
217 by the Cluster1 cells derived from *Foxc2*<sup>f/+</sup> mice, Subclusters0 was featured by stemness markers,  
218 while Subcluster1, representing the majority of Cluster1 cells from *Foxc2*<sup>f/f</sup>;*Ddx4*-cre mice, was  
219 featured by progenitor markers (Fig. S6B, C). Consistently, pseudotime analysis showed that  
220 Cluster1 cells from *Foxc2*<sup>f/+</sup> mice projected a forward stage of the developmental trajectory  
221 indicated by stemness markers, whereas Cluster1 cells from *Foxc2*<sup>f/f</sup>;*Ddx4*-cre mice were  
222 associated with a later stage of the developmental trajectory (Fig.6D, Fig. S6D, E). More  
223 specifically, less number of cells were found at the starting state1 in Cluster1 from *Foxc2*<sup>f/f</sup>;*Ddx4*-  
224 cre mice than in *Foxc2*<sup>f/+</sup> mice, with rather more cells in the developmental progression (from state1  
225 to state5), especially at the advanced state5 (Fig. 6E). Thus, FOXC2 deletion caused defective  
226 SSCs maintenance and committed the primitive SSCs to a differentiation destiny. Further, there  
227 were 932 genes down-regulated in Cluster1 cells derived from *Foxc2*<sup>f/f</sup>;*Ddx4*-cre mice in  
228 comparison to *Foxc2*<sup>f/+</sup> mice (Fig. 6F, Supplemental Table S2), which were functionally associated  
229 with both stem cell population maintenance and mitotic cell cycle (Fig. 6G). Consistently, the GSEA  
230 analysis revealed a more progressive cell cycle in Cluster1 upon *Foxc2*-knockout (Fig. 6H),  
231 confirming the role of FOXC2 in regulating the cell cycle of the primitive SSCs.

232 We then performed Cleavage Under Targets and Tagmentation (CUT&Tag) sequencing to  
233 explore the underlying mechanism (39, 40), for which GFP<sup>+</sup> SSCs from *Foxc2*<sup>CRE/+</sup>;*R26T/G<sup>flf</sup>* mice  
234 3 days after tamoxifen induction, representing the FOXC2<sup>+</sup>-SSCs, were isolated for CUT&Tag  
235 sequencing (Fig. 7A). Specific peaks enriched in the promoter region of 3629 genes (Fig. 7B, C;

236 Supplemental Table S2) showed functional enrichment in biological processes such as DNA repair  
237 and mitotic cell cycle regulation (Fig. 7D). By overlapping with the 932 genes down-regulated in  
238 Cluster1 cells from *Foxc2<sup>f/f</sup>; Ddx4-cre* mice, we obtained 306 genes as the candidates subjective  
239 to the regulation by FOXC2 (Fig. 7E; Supplemental Table S2). Further, GO enrichment analysis of  
240 these genes highlighted a distinctive functional cluster (11 genes) focusing on the negative  
241 regulation of cell cycle (Fig. 7F; Supplemental Table S3) (41-50). More specifically, significant  
242 peaks enrichment at the promoter region were observed for these candidate genes (Fig. 7G).  
243 Meanwhile, as predicted using the JASPAR Scan function (binding potential >0.8), there showed  
244 strong binding potential of FOXC2 towards these candidate genes (Fig. 7I) via the binding motif of  
245 FOXC2 (Fig. 7H), which was further confirmed by the results from the CUT&Tag qPCR (Fig. 7J).  
246 Overall results implied that FOXC2 may function as a gatekeeper that ensures the quiescent state  
247 of the primitive SSCs by impeding cell cycle progression.

248

## 249 Discussion

250

251 In this work, a comprehensive analysis of uSPG populations with scRNA-seq and the following  
252 lineage tracing study by whole-mount immunofluorescence assay led to the identification of  
253 FOXC2-expressing SSCs as an important and primitive SSCs subpopulation in adult mice. Further  
254 investigation through functionality analysis confirmed FOXC2 is essential for SSCs self-renewal  
255 and stemness, thereby is required for maintaining the SSCs population that is critical for continuous  
256 spermatogenesis. Importantly, our data demonstrated that the colonies formed by FOXC2<sup>+</sup> cells  
257 constituted nearly the total length of the seminiferous tubules (99.31%), implying that the FOXC2<sup>+</sup>-  
258 SSCs can support the complete spermatogenesis in adult mice.

259 GFRA1<sup>+</sup> A<sub>pr</sub> and A<sub>al</sub> cells were found to break randomly and a portion of them can return to the  
260 stem cell state (5). Interestingly, our findings showed FOXC2 appeared in one of the A<sub>pr</sub> or A<sub>al</sub> cells  
261 at times, therefore raising a possibility that the subset of GFRA1<sup>+</sup> cells that return to stem cell state  
262 after intercellular bridge break, maybe FOXC2<sup>+</sup> due to different cell cycle state. If so, based on both  
263 findings, GFRA1<sup>+</sup>FOXC2<sup>+</sup> could represent a quiescent state whereas GFRA1<sup>+</sup>FOXC2<sup>-</sup> is proliferate  
264 active, which certainly requires further validation possibly through multiple lineage tracing and live  
265 imaging.

266 We observed that the FOXC2<sup>-</sup>-SSCs were almost all in a non-proliferative state (~94.9%), and  
267 further revealed that FOXC2 functioned in the negative regulation of cell cycle progression, thus  
268 confirming that FOXC2-expressing SSCs are quiescent SSCs population in adult mice. The finding  
269 that FOXC2 inhibited cell cycle and differentiation of SSCs in testis is consistent with that reported  
270 in other tissues (51, 52). In general, the quiescent state is a protective mechanism for stem cell  
271 storage and prevents stem cells from damage or depletion under genotoxic stresses (1, 53-55). In  
272 our work, after the busulfan treatment, the quantity of FOXC2<sup>+</sup> cells remained stable and the  
273 survived uSPGs were predominantly FOXC2<sup>+</sup>, indicating its insensitivity to cytotoxic agents.  
274 However, the proportion of MKI67<sup>+</sup>FOXC2<sup>+</sup> cells increased by 15.92% after 30 days of the busulfan  
275 treatment and decreased back to the pre-treatment level (5.08%) at 120 days, implying that the  
276 quiescent FOXC2<sup>+</sup> cells were able to transform into the proliferative FOXC2<sup>+</sup> cells to replenish the  
277 SSCs pool to maintain the SSCs homeostasis and normal spermatogenesis. We further confirmed  
278 by lineage tracing analysis that FOXC2-expressing cells were the only remaining SSCs population  
279 and were responsible for germline regeneration after the busulfan treatment, indicating that  
280 FOXC2<sup>-</sup>-SSCs represent a functionally important stem cell population with regenerative ability. In  
281 the future, more insights into the unique regulation of SSCs can be drawn from studying and

282 comparing the transition between the quiescent and proliferative states in FOXC2<sup>+</sup> and other SSCs  
283 subpopulations.

284 According to our findings, we proposed a model for the maintenance of the FOXC2<sup>+</sup> SSCs  
285 subpopulation (Fig. 7K). Under physiological conditions, FOXC2<sup>+</sup> A<sub>s</sub> cells (including  
286 FOXC2<sup>+</sup>GFRA1<sup>+</sup>, FOXC2<sup>+</sup>EOMES<sup>+</sup> cells, etc.) constitute the primitive population of SSCs, of which  
287 only a small proportion (~5.1%) cells are proliferative while the majority remains quiescent (Fig.  
288 7Ka). This primitive population can divide symmetrically or asymmetrically into different A<sub>pr</sub> and A<sub>al</sub>  
289 (Fig. 7Kb). Then FOXC2<sup>+</sup> cells (Fig. 7Kb) may break from the syncytial and return to A<sub>s</sub> state (Fig.  
290 7Ka) to maintain the stable number of the primitive SSCs. FOXC2<sup>-</sup> progenies, derived from the  
291 FOXC2<sup>+</sup> primitive population, form a transit amplification (TA) SSCs pool (Fig. 7Kc) to support  
292 spermatogenesis. However, it requires continuous supply from the FOXC2<sup>+</sup> population and is  
293 subject to exhaustion when the supply is disrupted. In the context of regeneration conditions, the  
294 FOXC2<sup>+</sup>MKI67<sup>-</sup> cells can survive and set out the recovery process (Fig. 7Kd). At the early stage,  
295 increasing proportions of FOXC2<sup>+</sup>MKI67<sup>-</sup> cells are committed to transforming into proliferative  
296 FOXC2<sup>+</sup>MKI67<sup>+</sup> cells, strengthening the supply to the TA SSCs pool (Fig. 7Ke). At the late recovery  
297 stage, MKI67<sup>+</sup>/MKI67<sup>-</sup> ratio returns to the physiological level in FOXC2<sup>+</sup> population (Fig. 7Ka),  
298 leaving the total number of FOXC2<sup>+</sup> cells stable therefore maintaining the SSCs homeostasis.  
299 However, it is necessary to perform more investigation to further improve and modify this model to  
300 gain a complete understanding of the connections between different primitive SSCs subpopulations  
301 via lineage tracing assays in the testes of adult mice.

302 Based on our observation, FOXC2 seems nonessential for the transformation from gonocytes to  
303 SSCs in infant mice, in contrast to its requirement for adult spermatogenesis. A recent study  
304 showed that FOXC2 was present in a fraction of A<sub>8</sub> and A<sub>16</sub> cells in the postnatal mouse testis (<5  
305 weeks), however, this FOXC2<sup>+</sup> subpopulation appeared more active in proliferation than the adult  
306 counterpart (56). Such differential functionality might reflect the difference in the physical nature of  
307 spermatogenesis between developmental stages. For example, the maturity of spermatogenesis  
308 is still under development during the juvenile period with a focus on expanding the SSCs pool.  
309 Therefore, it would be interesting to explore differences in individual functional contexts as well as  
310 the underlying regulatory mechanisms. Meanwhile, FOXC2, highly conserved between mice and  
311 humans with 94% identity in amino acid sequence (57), is also expressed in a subset of human  
312 adult SSCs, raising the possibility of an evolutionarily conserved mechanism governing SSCs  
313 homeostasis in humans. Further work following this direction might be of great clinical significance  
314 specifically to patients who suffer from infertility. Moreover, the developmental correlation between  
315 FOXC2<sup>+</sup>-SSCs and other SSCs subpopulations proposed previously should be revealed via  
316 biological methods such as multiple lineage tracing and live imaging. Collectively, our work here  
317 provides new insights into the investigation of adult SSCs and serves as a reference for studying  
318 the homeostasis and regeneration of other stem-cell systems.

319

## 320 **Materials and Methods**

321

322 **Data Availability.** All data are available in the main text or supplementary materials. The scRNA-  
323 seq and CUT&Tag sequencing data have been uploaded to the GEO with accession codes  
324 GSE183163, GSE180729, and GSE180926. All of the R packages were available online and the  
325 code was used according to respective R packages documentation as described in the Methods.  
326 The MSigDB (v.7.0) used in this study is available at <https://www.gsea-msigdb.org/gsea/msigdb>.

327 **Additional Experimental Procedures.** The procedures for mice, magnetic-activated cell sorting  
328 (MACS), single-cell RNA-seq, single-cell RNA-seq data processing, CUT & TAG sequencing and

329 analysis, enrichment analyses, transplantation assay, fluorescence-activated cell sorting (FACS),  
330 immunofluorescence, RNA isolation and quantitative RT-PCR analysis, tamoxifen inducible,  
331 analyses of cell density, sperm counts, histology, evaluation of degenerating tubules, and statistical  
332 analysis are presented in the Supplemental Materials and Methods.

333

### 334 **Acknowledgments**

335

336 This work was supported by the National Key Research and Development Program of China grant  
337 (2022YFA0806302, 2018YFC1003500, 2019YFA0801800), CAMS Innovation Fund for Medical  
338 Sciences (CIFMS, 2021-I2M-1-019, 2017-I2M-3-009), National Natural Science Foundation of  
339 China grant (31970794, 32000586, 31725013, 32200646), and State Key Laboratory Special fund  
340 from the Ministry of Science grant (2060204).

341

### 342 **References**

343

- 344 1. S. Sharma, J. Wistuba, T. Pock, S. Schlatt, N. Neuhaus, Spermatogonial stem cells: updates  
345 from specification to clinical relevance. *Hum Reprod Update* **25**, 275-297 (2019).
- 346 2. D. G. de Rooij, L. D. Russell, All you wanted to know about spermatogonia but were afraid to  
347 ask. *J Androl* **21**, 776-798 (2000).
- 348 3. C. Huckins, Cell cycle properties of differentiating spermatogonia in adult Sprague-Dawley  
349 rats. *Cell Tissue Kinet* **4**, 139-154 (1971).
- 350 4. E. F. Oakberg, A new concept of spermatogonial stem-cell renewal in the mouse and its  
351 relationship to genetic effects. *Mutat Res* **11**, 1-7 (1971).
- 352 5. K. Hara *et al.*, Mouse spermatogenic stem cells continually interconvert between equipotent  
353 singly isolated and syncytial states. *Cell Stem Cell* **14**, 658-672 (2014).
- 354 6. A. R. Helsel *et al.*, ID4 levels dictate the stem cell state in mouse spermatogonia. *Development*  
355 **144**, 624-634 (2017).
- 356 7. G. M. Aloisio *et al.*, PAX7 expression defines germline stem cells in the adult testis. *J Clin*  
357 *Invest* **124**, 3929-3944 (2014).
- 358 8. M. Jijiwa *et al.*, GDNF-mediated signaling via RET tyrosine 1062 is essential for maintenance  
359 of spermatogonial stem cells. *Genes Cells* **13**, 365-374 (2008).
- 360 9. M. Sharma *et al.*, Identification of EOMES-expressing spermatogonial stem cells and their  
361 regulation by PLZF. *Elife* **8** (2019).
- 362 10. A. Sada, A. Suzuki, H. Suzuki, Y. Saga, The RNA-binding protein NANOS2 is required to  
363 maintain murine spermatogonial stem cells. *Science* **325**, 1394-1398 (2009).
- 364 11. M. Tokue *et al.*, SHISA6 Confers Resistance to Differentiation-Promoting Wnt/ $\beta$ -Catenin  
365 Signaling in Mouse Spermatogenic Stem Cells. *Stem Cell Reports* **8**, 561-575 (2017).
- 366 12. H. M. La *et al.*, Identification of dynamic undifferentiated cell states within the male germline.  
367 *Nat Commun* **9**, 2819 (2018).
- 368 13. J. M. Oatley, M. R. Avarbock, R. L. Brinster, Glial cell line-derived neurotrophic factor  
369 regulation of genes essential for self-renewal of mouse spermatogonial stem cells is  
370 dependent on Src family kinase signaling. *J Biol Chem* **282**, 25842-25851 (2007).
- 371 14. R. Guo *et al.*, Stage-specific and tissue-specific expression characteristics of differentially  
372 expressed genes during mouse spermatogenesis. *Mol Reprod Dev* **67**, 264-272 (2004).
- 373 15. T. Nakagawa *et al.*, A multistate stem cell dynamics maintains homeostasis in mouse  
374 spermatogenesis. *Cell Rep* **37**, 109875 (2021).



- 375 16. C. T. J. van Velthoven, T. A. Rando, Stem Cell Quiescence: Dynamism, Restraint, and Cellular  
376 Idling. *Cell Stem Cell* **24**, 213-225 (2019).
- 377 17. J. Guo *et al.*, The adult human testis transcriptional cell atlas. *Cell Res* **28**, 1141-1157 (2018).
- 378 18. B. P. Hermann *et al.*, The Mammalian Spermatogenesis Single-Cell Transcriptome, from  
379 Spermatogonial Stem Cells to Spermatids. *Cell Rep* **25**, 1650-1667.e1658 (2018).
- 380 19. M. Wang *et al.*, Single-Cell RNA Sequencing Analysis Reveals Sequential Cell Fate Transition  
381 during Human Spermatogenesis. *Cell Stem Cell* **23**, 599-614.e594 (2018).
- 382 20. K. Tan, M. F. Wilkinson, Human Spermatogonial Stem Cells Scrutinized under the Single-Cell  
383 Magnifying Glass. *Cell Stem Cell* **24**, 201-203 (2019).
- 384 21. S. Suzuki, J. R. McCarrey, B. P. Hermann, An mTORC1-dependent switch orchestrates the  
385 transition between mouse spermatogonial stem cells and clones of progenitor spermatogonia.  
386 *Cell Rep* **34**, 108752 (2021).
- 387 22. H. Kubota, M. R. Avarbock, R. L. Brinster, Culture conditions and single growth factors affect  
388 fate determination of mouse spermatogonial stem cells. *Biol Reprod* **71**, 722-731 (2004).
- 389 23. S. S. Hammoud *et al.*, Chromatin and transcription transitions of mammalian adult germline  
390 stem cells and spermatogenesis. *Cell Stem Cell* **15**, 239-253 (2014).
- 391 24. M. Kanatsu-Shinohara, H. Morimoto, T. Shinohara, Enrichment of mouse spermatogonial  
392 stem cells by melanoma cell adhesion molecule expression. *Biol Reprod* **87**, 139 (2012).
- 393 25. F. W. Buaas *et al.*, Plzf is required in adult male germ cells for stem cell self-renewal. *Nat*  
394 *Genet* **36**, 647-652 (2004).
- 395 26. J. A. Costoya *et al.*, Essential role of Plzf in maintenance of spermatogonial stem cells. *Nat*  
396 *Genet* **36**, 653-659 (2004).
- 397 27. H. M. La, R. M. Hobbs, Mechanisms regulating mammalian spermatogenesis and fertility  
398 recovery following germ cell depletion. *Cell Mol Life Sci* **76**, 4071-4102 (2019).
- 399 28. T. Nakagawa, Y. Nabeshima, S. Yoshida, Functional identification of the actual and potential  
400 stem cell compartments in mouse spermatogenesis. *Dev Cell* **12**, 195-206 (2007).
- 401 29. Y. Clermont, Renewal of spermatogonia in man. *Am J Anat* **118**, 509-524 (1966).
- 402 30. Y. Clermont, Spermatogenesis in man. A study of the spermatogonial population. *Fertil Steril*  
403 **17**, 705-721 (1966).
- 404 31. Y. Clermont, Two classes of spermatogonial stem cells in the monkey (*Cercopithecus*  
405 *aethiops*). *Am J Anat* **126**, 57-71 (1969).
- 406 32. J. Ehmcke, S. Schlatt, A revised model for spermatogonial expansion in man: lessons from  
407 non-human primates. *Reproduction* **132**, 673-680 (2006).
- 408 33. J. Ehmcke, J. Wistuba, S. Schlatt, Spermatogonial stem cells: questions, models and  
409 perspectives. *Hum Reprod Update* **12**, 275-282 (2006).
- 410 34. D. Wang *et al.*, Identification of multipotent mammary stem cells by protein C receptor  
411 expression. *Nature* **517**, 81-84 (2015).
- 412 35. K. Zheng, X. Wu, K. H. Kaestner, P. J. Wang, The pluripotency factor LIN28 marks  
413 undifferentiated spermatogonia in mouse. *BMC Dev Biol* **9**, 38 (2009).
- 414 36. Y. Toyooka *et al.*, Expression and intracellular localization of mouse Vasa-homologue protein  
415 during germ cell development. *Mech Dev* **93**, 139-149 (2000).
- 416 37. H. Li *et al.*, DAZL is a master translational regulator of murine spermatogenesis. *Natl Sci Rev*  
417 **6**, 455-468 (2019).
- 418 38. T. Gallardo, L. Shirley, G. B. John, D. H. Castrillon, Generation of a germ cell-specific mouse  
419 transgenic Cre line, Vasa-Cre. *Genesis* **45**, 413-417 (2007).
- 420 39. H. S. Kaya-Okur, D. H. Janssens, J. G. Henikoff, K. Ahmad, S. Henikoff, Efficient low-cost  
421 chromatin profiling with CUT&Tag. *Nat Protoc* **15**, 3264-3283 (2020).



- 422 40. H. S. Kaya-Okur *et al.*, CUT&Tag for efficient epigenomic profiling of small samples and single  
423 cells. *Nat Commun* **10**, 1930 (2019).
- 424 41. R. Bahar *et al.*, Growth retardation, polyploidy, and multinucleation induced by Clast3, a novel  
425 cell cycle-regulated protein. *J Biol Chem* **277**, 40012-40019 (2002).
- 426 42. C. M. Knudson, S. J. Korsmeyer, Bcl-2 and Bax function independently to regulate cell death.  
427 *Nat Genet* **16**, 358-363 (1997).
- 428 43. M. van Oosten *et al.*, Mismatch repair protein Msh2 contributes to UVB-induced cell cycle  
429 arrest in epidermal and cultured mouse keratinocytes. *DNA Repair (Amst)* **4**, 81-89 (2005).
- 430 44. J. L. Nitiss, DNA topoisomerase II and its growing repertoire of biological functions. *Nat Rev*  
431 *Cancer* **9**, 327-337 (2009).
- 432 45. X. Yi *et al.*, RNA processing and modification protein, carbon catabolite repression 4 (Ccr4),  
433 arrests the cell cycle through p21-dependent and p53-independent pathway. *J Biol Chem* **287**,  
434 21045-21057 (2012).
- 435 46. P. Gaudet, M. S. Livstone, S. E. Lewis, P. D. Thomas, Phylogenetic-based propagation of  
436 functional annotations within the Gene Ontology consortium. *Brief Bioinform* **12**, 449-462  
437 (2011).
- 438 47. B. A. Weaver *et al.*, Centromere-associated protein-E is essential for the mammalian mitotic  
439 checkpoint to prevent aneuploidy due to single chromosome loss. *J Cell Biol* **162**, 551-563  
440 (2003).
- 441 48. M. M. Georgescu, G. Cote, N. K. Agarwal, C. L. White, 3rd, NHERF1/EBP50 controls  
442 morphogenesis of 3D colonic glands by stabilizing PTEN and ezrin-radixin-moesin proteins at  
443 the apical membrane. *Neoplasia* **16**, 365-374.e361-362 (2014).
- 444 49. M. Raman, S. Earnest, K. Zhang, Y. Zhao, M. H. Cobb, TAO kinases mediate activation of  
445 p38 in response to DNA damage. *Embo j* **26**, 2005-2014 (2007).
- 446 50. W. J. Bakker *et al.*, FoxO3a regulates erythroid differentiation and induces BTG1, an activator  
447 of protein arginine methyl transferase 1. *J Cell Biol* **164**, 175-184 (2004).
- 448 51. K. E. Davis, M. Moldes, S. R. Farmer, The forkhead transcription factor FoxC2 inhibits white  
449 adipocyte differentiation. *J Biol Chem* **279**, 42453-42461 (2004).
- 450 52. A. Sabine *et al.*, FOXC2 and fluid shear stress stabilize postnatal lymphatic vasculature. *J Clin*  
451 *Invest* **125**, 3861-3877 (2015).
- 452 53. F. Arai, T. Suda, Maintenance of quiescent hematopoietic stem cells in the osteoblastic niche.  
453 *Ann N Y Acad Sci* **1106**, 41-53 (2007).
- 454 54. F. Relaix, P. S. Zammit, Satellite cells are essential for skeletal muscle regeneration: the cell  
455 on the edge returns centre stage. *Development* **139**, 2845-2856 (2012).
- 456 55. J. T. Rodgers *et al.*, mTORC1 controls the adaptive transition of quiescent stem cells from G0  
457 to G(Alert). *Nature* **510**, 393-396 (2014).
- 458 56. C. Wei, H. Lin, S. Cui, The Forkhead Transcription Factor FOXC2 Is Required for Maintaining  
459 Murine Spermatogonial Stem Cells. *Stem Cells Dev* **27**, 624-636 (2018).
- 460 57. N. Miura, K. Iida, H. Kakinuma, X. L. Yang, T. Sugiyama, Isolation of the mouse (MFH-1) and  
461 human (FKHL 14) mesenchyme fork head-1 genes reveals conservation of their gene and  
462 protein structures. *Genomics* **41**, 489-492 (1997).

463 **Figures and Tables**  
464

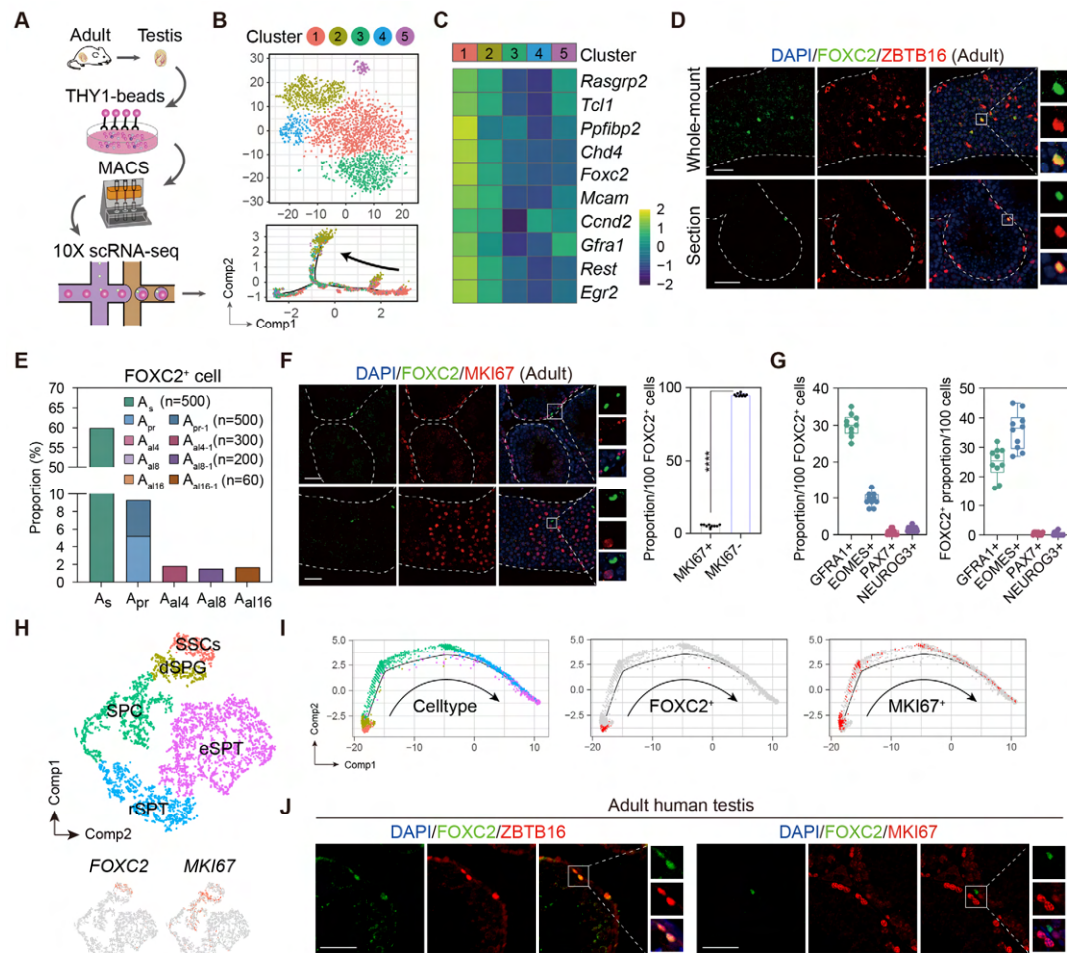

465  
466  
467 **Figure 1. Identification of the FOXC2<sup>+</sup>-SSCs in adult mouse and human testis.** (A) Schematic  
468 illustration of the single-cell analysis workflow. (B) t-SNE plot and developmental trajectory of all  
469 uSPG, colored by cluster. (C) Heatmap of the Top10 DEGs in Cluster1. (D) Immunostaining for  
470 ZBTB16 (red), FOXC2 (green), and DAPI (blue) in testicular paraffin sections from wild-type adult  
471 C57 mice. Scale bar, 50  $\mu$ m; C57, C57BL/6J. (E) The proportion of FOXC2<sup>+</sup> cells in different uSPG  
472 subtypes. (F) Immunostainings for MKI67 (red), FOXC2 (green), and DAPI (blue) in adult mice  
473 testis and the proportion of MKI67<sup>+</sup> cells in FOXC2<sup>+</sup> population (n=10). Scale bar, 50  $\mu$ m; values,  
474 mean  $\pm$  s.e.m.; p-values were obtained using two-tailed t-tests (\*\*\*\*p-value < 0.0001). (G) The  
475 co-expression proportion between the FOXC2 and differential known SSCs makers (n=10). (H) t-SNE  
476 plot of germ cells in adult human testis (GSE112013), colored by germ cell type. Feature plot  
477 showing the expression patterns of FOXC2 and MKI67 in human germ cells. (I) The developmental  
478 trajectory of the human germ cells, colored by germ cell type, FOXC2 expression cells (red), or  
479 MKI67 expression cells (red). (J) Immunostaining for ZBTB16/MKI67 (red), FOXC2 (green), and  
480 DAPI (blue) in testicular paraffin sections from adult humans.

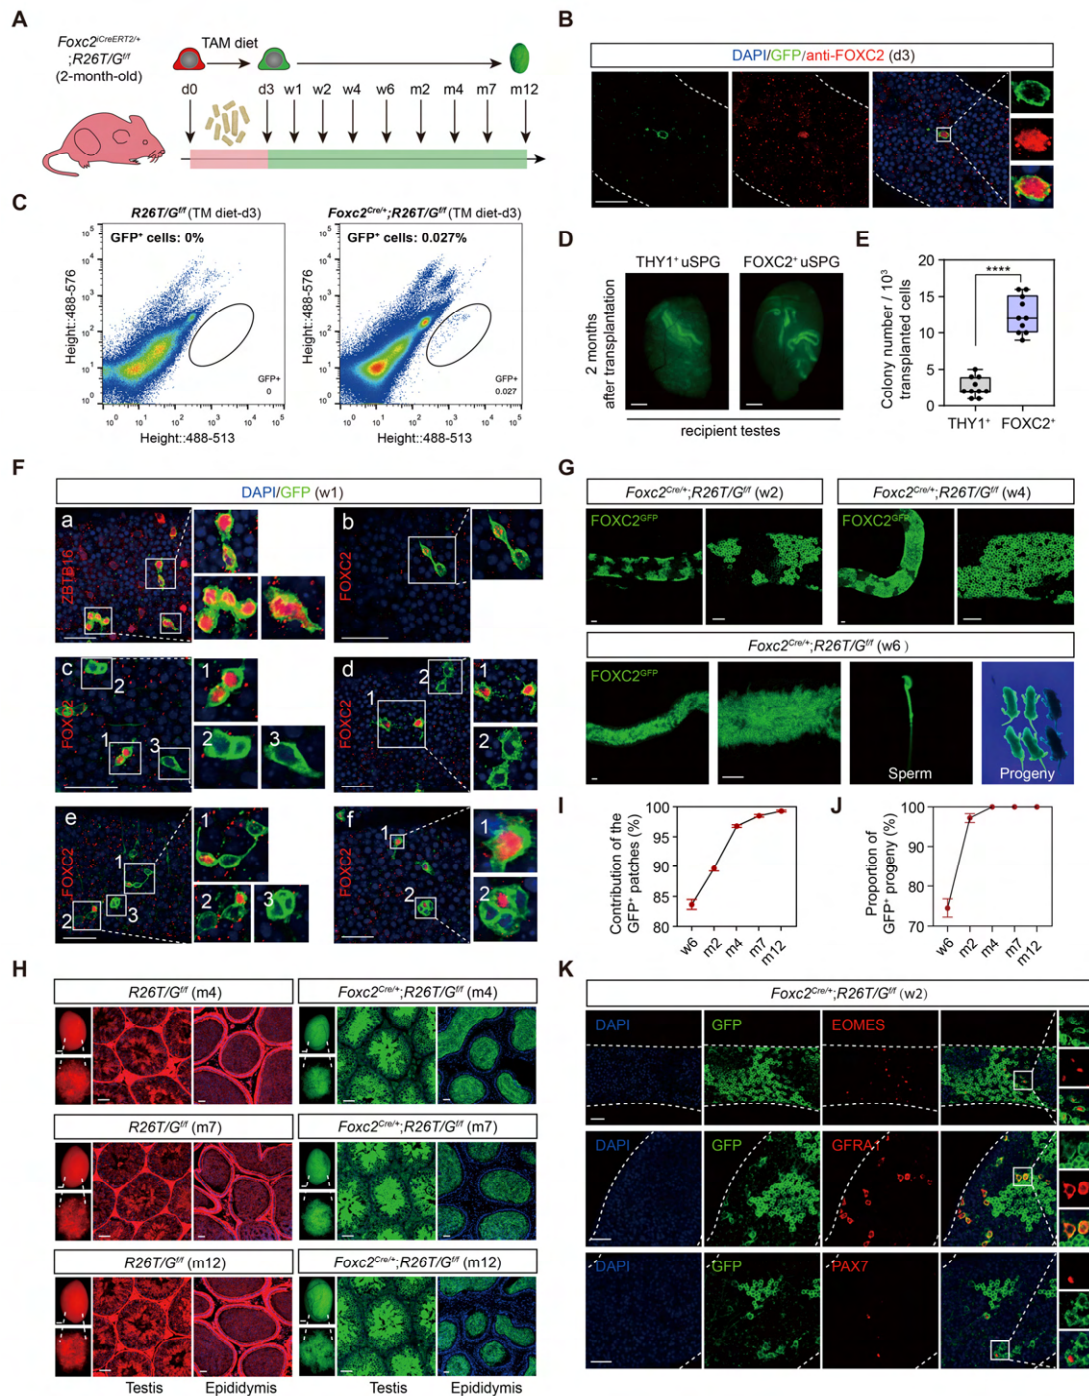

481  
482  
483  
484  
485  
486  
487

**Figure 2. Lineage tracing and functional validation of FOXC2<sup>+</sup>-SSCs in *Foxc2*<sup>CRE/+</sup>;*R26T/G*<sup>ff</sup> mice.** (A) Schematic illustration of the lineage tracing workflow for FOXC2<sup>+</sup> cells. (B) Immunostainings for DAPI (blue) and FOXC2 (red) at day 3 post TAM induction. Scale bar, 50  $\mu$ m; d, day. (C) FACS analysis of GFP<sup>+</sup> populations derived from *R26T/G*<sup>ff</sup> or *Foxc2*<sup>CRE/+</sup>;*R26T/G*<sup>ff</sup> mice at day 3 post TAM induction. (D, E) The recipient mice testes (D) and colony numbers (E) 2 months

488 after transplantation (n=10) of the FACS-sorted GFP<sup>+</sup> cells from the *Foxc2*<sup>CRE/+</sup>;*R26T/G<sup>fl</sup>* mice 3  
489 days after TAM diet and the MACS-sorted THY1<sup>+</sup> cells from adult mice. Scale bar, 1 mm; values,  
490 mean ± s.e.m.; p-values were obtained using two-tailed t-tests (\*\*\*\*p-value < 0.0001). (F)  
491 Immunostaining for DAPI (blue), ZBTB16/FOXC2 (red), and GFP (green) at week 1 post TAM  
492 induction (scale bar, 50 μm). (G) Seminiferous tubules of *Foxc2*<sup>CRE/+</sup>;*R26T/G<sup>fl</sup>* mice 2, 4, and 6  
493 weeks post TAM induction. Scale bar, 50 μm. (H) Testes (scale bar, 1 mm), seminiferous tubules,  
494 and epididymis (scale bar, 50 μm) at month 4, 7, and 12 post TAM induction in *Foxc2*<sup>CRE/+</sup>;*R26T/G<sup>fl</sup>*  
495 mice. (I, J) The GFP<sup>+</sup> patches (I) and progeny (J) population dynamics (n=10). Values, mean ±  
496 s.e.m. (K) Immunostainings for DAPI (blue), EOMES (red), GFRA1 (red), or PAX7 (red) in GFP<sup>+</sup>  
497 population at week 2 post TAM induction. Scale bar, 50 μm.



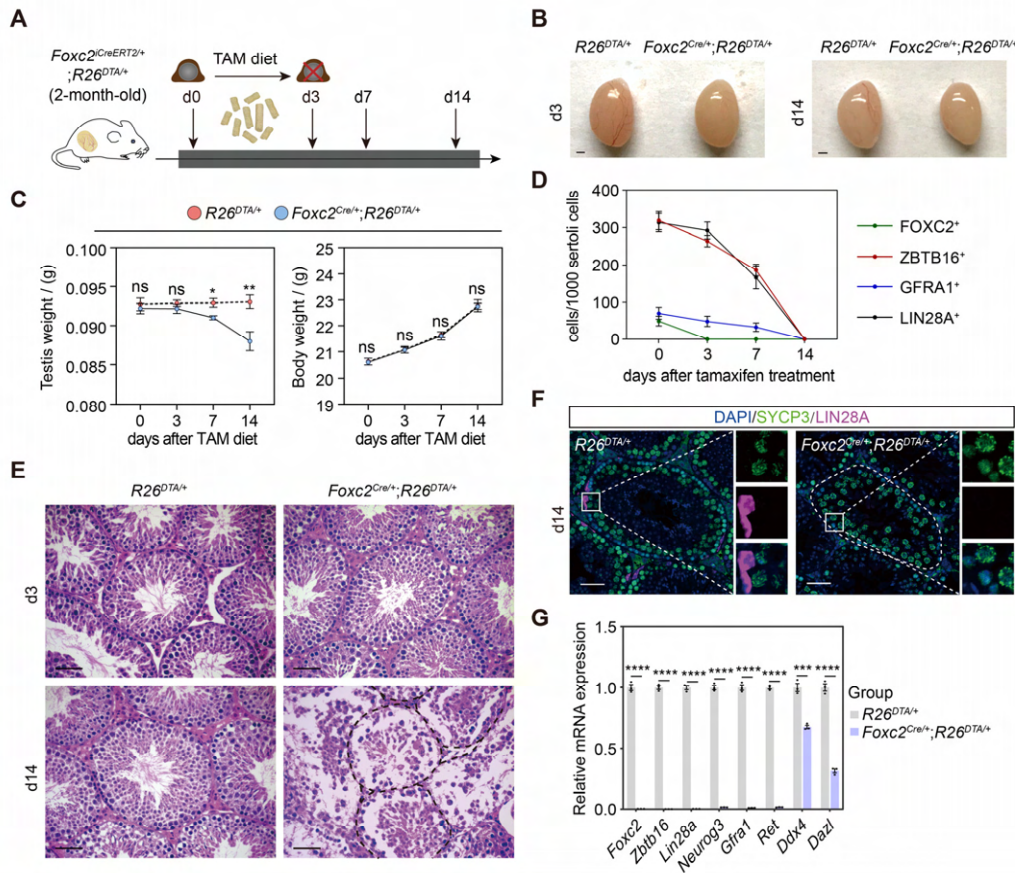

498

499

500 **Figure 3. Specific ablation of FOXC2<sup>+</sup>-SSCs and phenotypic validation in *Foxc2<sup>Cre/+</sup>;R26<sup>DTA/+</sup>***

501 **mice. (A)** Schematic illustration of the lineage tracing workflow for FOXC2<sup>+</sup> cells. **(B-D)** Phenotypic

502 validation of the *R26<sup>DTA/+</sup>* and *Foxc2<sup>Cre/+</sup>;R26<sup>DTA/+</sup>* mice (n=5) for testes size **(B)**, testis weight and

503 body weight **(C)**, and HE-staining of the testes **(D)**. Scale bars in **(B)**, 1 mm; in **(D)**, 50  $\mu$ m; d, day;

504 values were mean  $\pm$  s.e.m.; p-values were obtained using two-tailed t-tests (ns > 0.05, \*p-value <

505 0.05, \*\*p-value < 0.01). **(E)** ZBTB16<sup>+</sup>, GFRA1<sup>+</sup>, LIN28A<sup>+</sup>, and FOXC2<sup>+</sup> SPG populations dynamics.

506 Values, mean  $\pm$  s.e.m. (n=10); p-values were obtained using one-way ANOVA followed by Tukey

507 test (ns > 0.05, \*p-value < 0.05, \*\*p-value < 0.01, \*\*\*\*p-value < 0.0001). **(F)** Immunostainings for

508 DAPI (blue), SYCP3 (green), and LIN28A (magenta) at day 14 post TAM induction. d, day; scale

509 bar, 50  $\mu$ m. **(G)** Quantitative RT-PCR analysis of SPG markers expression in the testes of the

510 *R26<sup>DTA/+</sup>* and *Foxc2<sup>Cre/+</sup>;R26<sup>DTA/+</sup>* mice (n=3). Values, mean  $\pm$  s.e.m.; p-values were obtained using

511 two-tailed t-tests (\*\*p-value < 0.01, \*\*\*\*p-value < 0.0001).

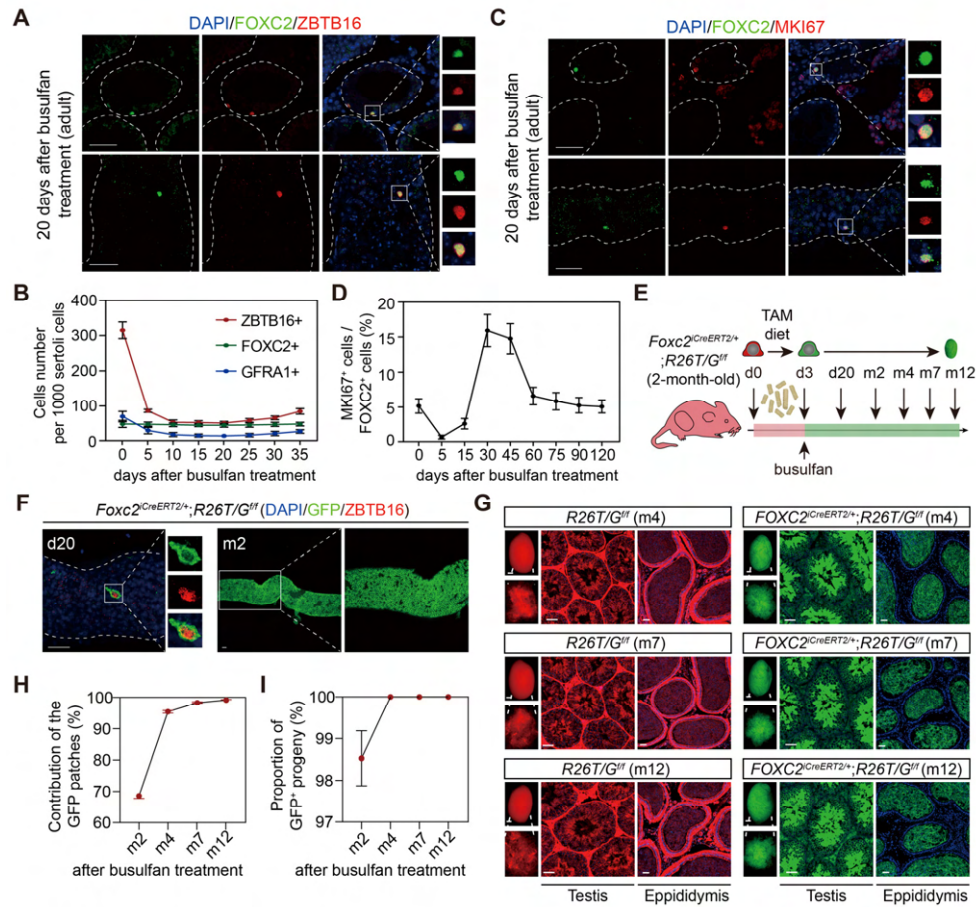

512  
513

514 **Figure 4. FOXC2<sup>+</sup>SSCs are critical for germline regeneration.** (A) Co-immunostaining of  
515 FOXC2 (green) with ZBTB16 (red) in seminiferous tubules of the adult testes at day 20 post  
516 busulfan treatment. Scale bar, 50  $\mu$ m. (B) ZBTB16<sup>+</sup>, GFRA1<sup>+</sup>, and FOXC2<sup>+</sup> population dynamics  
517 after busulfan treatment (20 mg/kg, n=10). (C) Co-immunostaining of FOXC2 (green) with MKI67  
518 (red) in seminiferous tubules of the adult testes at day 20 post busulfan treatment. Scale bar, 50  
519  $\mu$ m. (D) MKI67<sup>+</sup>FOXC2<sup>+</sup> proportions in relation to the whole FOXC2<sup>+</sup> population at different time  
520 points after busulfan treatment (n=4). (E) Schematic illustration for lineage tracing of FOXC2<sup>+</sup> cell  
521 after busulfan treatment. (F) Lineage tracing of the GFP<sup>+</sup> cells at day 20 and month 2 after busulfan  
522 treatment (scale bar, 50  $\mu$ m). (G) The testes (scale bar, 1 mm), seminiferous tubules, and  
523 epididymis (scale bar, 50  $\mu$ m) at month 4, 7, and 12 post TAM induction and busulfan injection. m,  
524 month. (H, I) The proportion dynamics of GFP patches (H) and GFP<sup>+</sup> progenies (I). Values, mean  
525  $\pm$  s.e.m. (n=10). w, week; m, month.



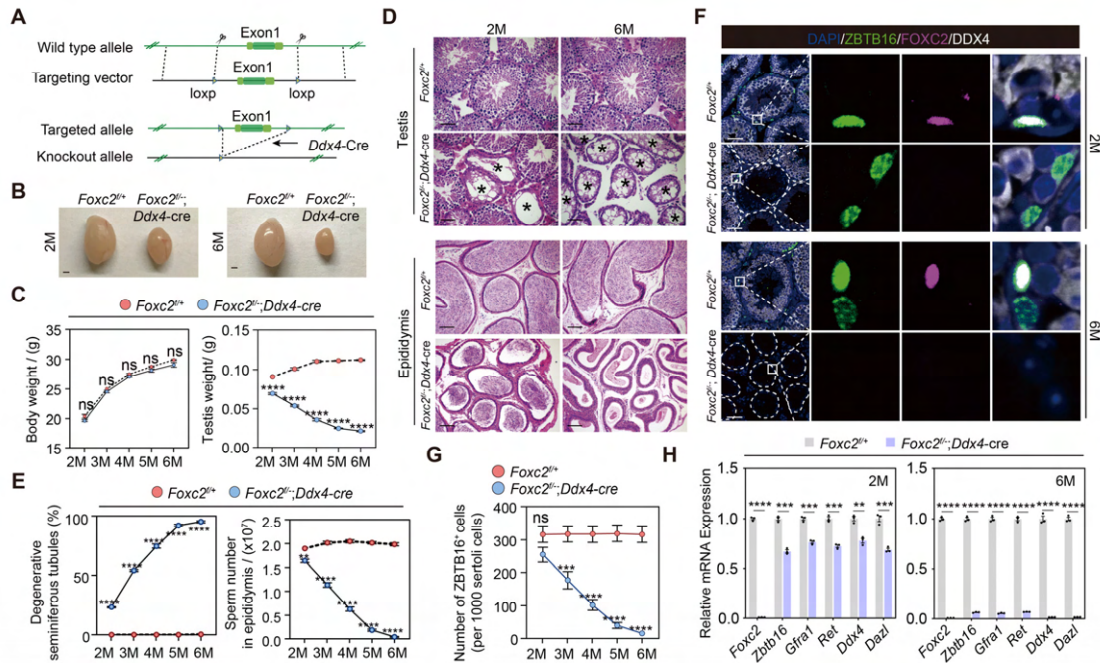

526  
527

528 **Figure 5. Spermatogenesis exhaustion in the adult *Foxc2<sup>fl/-</sup>;Ddx4-cre* mice.** (A) Construction  
529 of the *Foxc2<sup>fl/-</sup>;Ddx4-cre* mice. (B) The testes size of the *Foxc2<sup>fl/-</sup>;Ddx4-cre* mice. Scale bar, 1mm;  
530 M, month. (C) Body weight and testis weight of the *Foxc2<sup>fl/-</sup>;Ddx4-cre* mice at different age (n=5).  
531 M, month; values, mean  $\pm$  s.e.m.; p-values were obtained using two-tailed t-tests (ns > 0.05, \*\*\*\*  
532 p-value < 0.0001). (D) HE-staining of the testis and epididymis. Scale bar, 50  $\mu$ m; M, month. (E)  
533 Estimation of degenerative tubules and sperm counts in cauda epididymis of the *Foxc2<sup>fl/+</sup>* and  
534 *Foxc2<sup>fl/-</sup>;Ddx4-cre* mice with age (n=5). Values, mean  $\pm$  s.e.m.; p-values were obtained using two-  
535 tailed t-tests (\*\*p-value < 0.01, \*\*\*\*p-value < 0.0001). (F) Immunostainings for DAPI (blue), ZBTB16  
536 (green), FOXC2 (magenta), and DDX4 (white) in the seminiferous tubules of the *Foxc2<sup>fl/+</sup>* and  
537 *Foxc2<sup>fl/-</sup>;Ddx4-cre* mice. Scale bar, 50  $\mu$ m. (G) Estimation of ZBTB16<sup>+</sup> uSPG number in the *Foxc2<sup>fl/+</sup>*  
538 and *Foxc2<sup>fl/-</sup>;Ddx4-cre* mice with age (n=5). Values, mean  $\pm$  s.e.m.; p-values were obtained using  
539 two-tailed t-tests (ns > 0.05, \*\*\*p-value < 0.001, \*\*\*\*p-value < 0.0001). (H) Quantitative RT-PCR  
540 analysis of the uSPG and germ cell markers expressed in the testis of the *Foxc2<sup>fl/+</sup>* and *Foxc2<sup>fl/-</sup>;*  
541 *Ddx4-cre* mice (n=3). M, month; values, mean  $\pm$  s.e.m.; p-values were obtained using two-tailed  
542 t-tests (\*\*p-value < 0.01, \*\*\*p-value < 0.001, \*\*\*\*p-value < 0.0001).

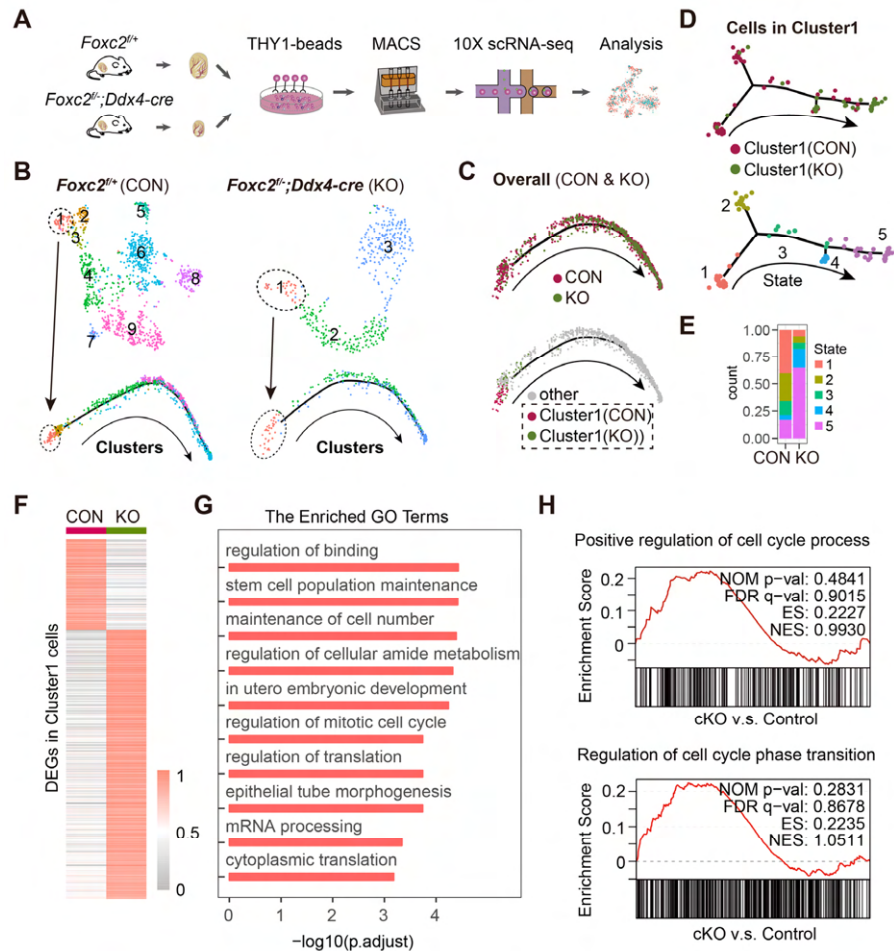

543

544

545

546 **Figure 6. scRNA-seq analysis of THY1<sup>+</sup> uSPG in *Foxc2<sup>fl/fl</sup>* and *Foxc2<sup>fl/fl</sup>;Ddx4-cre* mice.** (A)

547 Schematic illustration of the scRNA-seq workflow. (B) t-SNE plot and developmental trajectory of

548 uSPG from *Foxc2<sup>fl/fl</sup>* and *Foxc2<sup>fl/fl</sup>;Ddx4-cre* mice respectively, colored by cluster. (C) Developmental

549 trajectories of uSPG from *Foxc2<sup>fl/fl</sup>* and *Foxc2<sup>fl/fl</sup>;Ddx4-cre* mice, colored by sample or derivation. (D)

550 Developmental trajectories of the cells in Cluster1 from *Foxc2<sup>fl/fl</sup>* (CON) and *Foxc2<sup>fl/fl</sup>;Ddx4-cre* (KO)

551 mice, colored by derivation or developmental state. (E) The Cluster1 cells proportion of each state

552 in CON and KO mice. (F) Heatmap showing the DEGs in the Cluster1 cells from the *Foxc2<sup>fl/fl</sup>;Ddx4-*

553 *cre* mice compared with the *Foxc2<sup>fl/fl</sup>* mice. (G) Top GO terms enrichment by the down-regulated

554 DEGs in KO mice. (H) Gene set enrichment analysis (GSEA) of the Cluster1 cells (*Foxc2<sup>fl/fl</sup>;Ddx4-*

555 *cre* v.s. *Foxc2<sup>fl/fl</sup>* mice). NOM, nominal; FDR, false discovery rate; ES, enrichment score; NES,

556 normalized enrichment score.

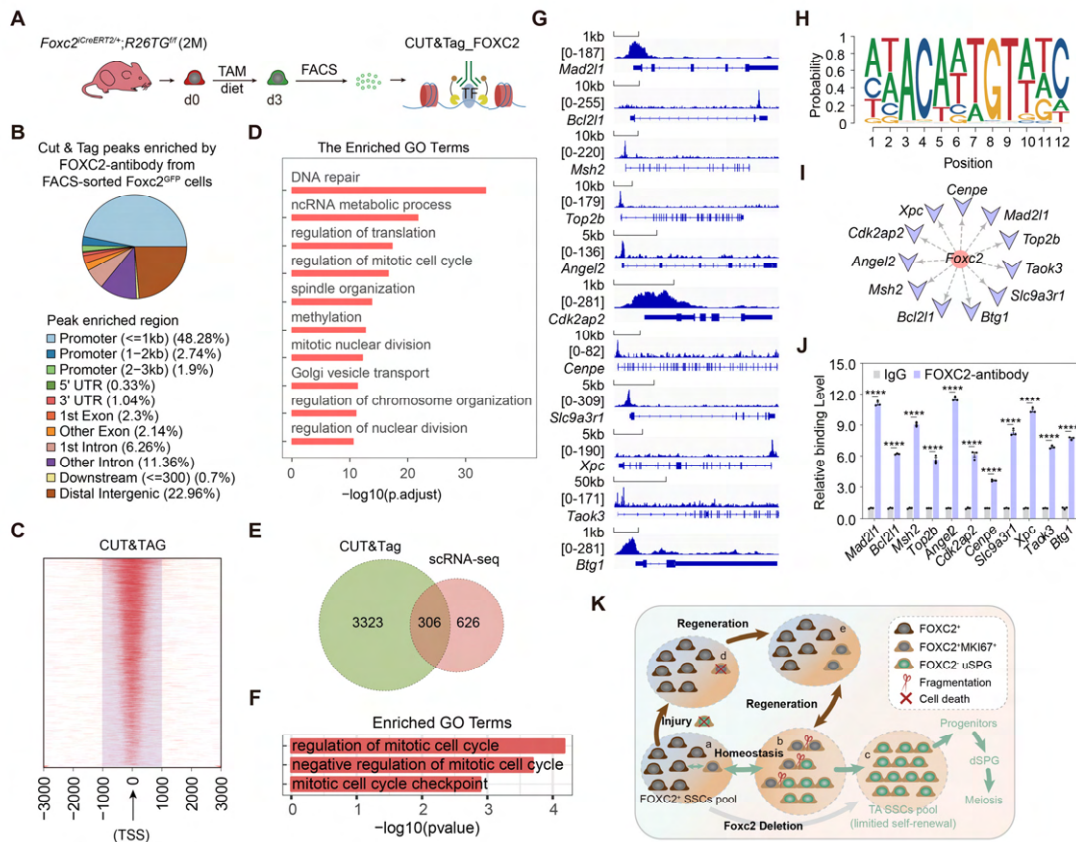

556  
557

558 **Figure 7. FOXC2 is essential for sustaining the primitive SSCs via regulating cell cycle.** (A)  
559 Workflow schematic illustration of the CUT&Tag\_FOXC2 analysis on the FACS-sorted FOXC2<sup>+</sup>  
560 cells. (B) Pie chart for CUT&Tag\_FOXC2 peaks genome distribution. (C) Profiling of  
561 CUT&Tag\_FOXC2 peaks in proximity to transcriptional starting site (TSS). The distance to TSS  
562 within 1000 was highlighted in the purple box. (D) Top GO terms enrichment by genes annotated  
563 by CUT&Tag\_FOXC2 peaks. (E) Venn diagram of FOXC2 target genes defined by overlapping the  
564 CUT&Tag sequencing and scRNA-seq datasets. (F) GO terms enrichment by the FOXC2 target  
565 genes related to cell cycle regulation. (G) Chromatin landscapes of CUT&Tag\_FOXC2 peaks of  
566 the candidates associated with negative cell cycle regulation. (H) The DNA-binding motif for FOXC2  
567 (predicted with HOMER). (I) The cell cycle-related candidates possessing high binding potential  
568 (>0.8, predicted with JASPAR SCAN). (J) CUT&Tag-qPCR validation of the cell cycle arrest  
569 regulatory genes. (n=3). Values, mean ± s.e.m.; p-values were obtained using two-tailed t-tests  
570 (\*\*\*\*p-value < 0.0001). (K) The model for the maintenance of the FOXC2<sup>+</sup> SSCs subpopulation in  
571 adult testis.

572 **Supplemental Figures**  
573

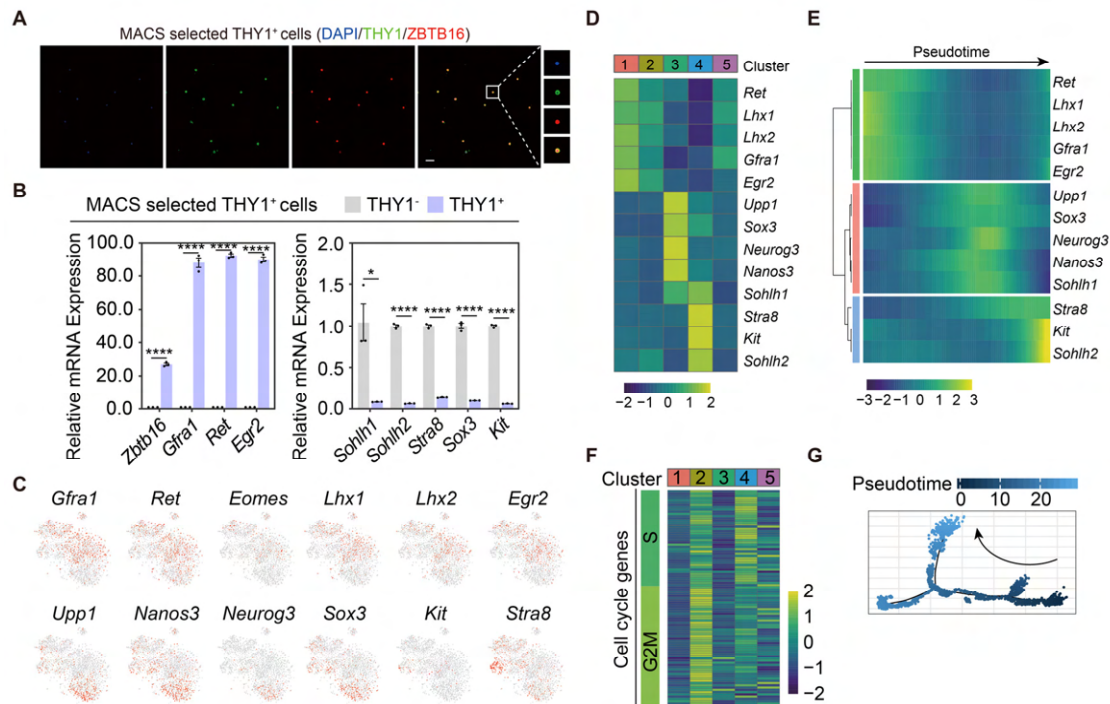

574 **Figure S1. Validation and characterization of the MACS-sorted THY1<sup>+</sup> uSPG from wild-type**  
575 **adult C57 mice. (A)** Immunostainings of DAPI (blue), THY1 (green), and ZBTB16 (red) in the  
576 MACS-sorted THY1<sup>+</sup> cells (n=5). Scale bar, 50 μm. **(B)** Quantitative RT-PCR analysis of uSPG and  
577 dSPG markers expressed in the MACS-sorted THY1<sup>+</sup> cells (n=3). Values, mean ± s.e.m.; p-values  
578 were obtained using two-tailed t-tests (ns > 0.05, \*p-value < 0.05, \*\*p-value < 0.01, \*\*\*p-value <  
579 0.001, \*\*\*\*p-value < 0.0001). **(C)** Feature plots showing the expression pattern of classic SPG  
580 markers (stemness and differentiation). **(D)** Heatmap showing the expression pattern of markers  
581 for SPG in different clusters. **(E)** Expression pattern dynamics of the SPG markers with pseudotime  
582 progression. **(F)** Heatmap showing the expression pattern of markers for cell cycle phase in  
583 different clusters. **(G)** The developmental trajectory of the overall SPG, colored by pseudotime.  
584  
585



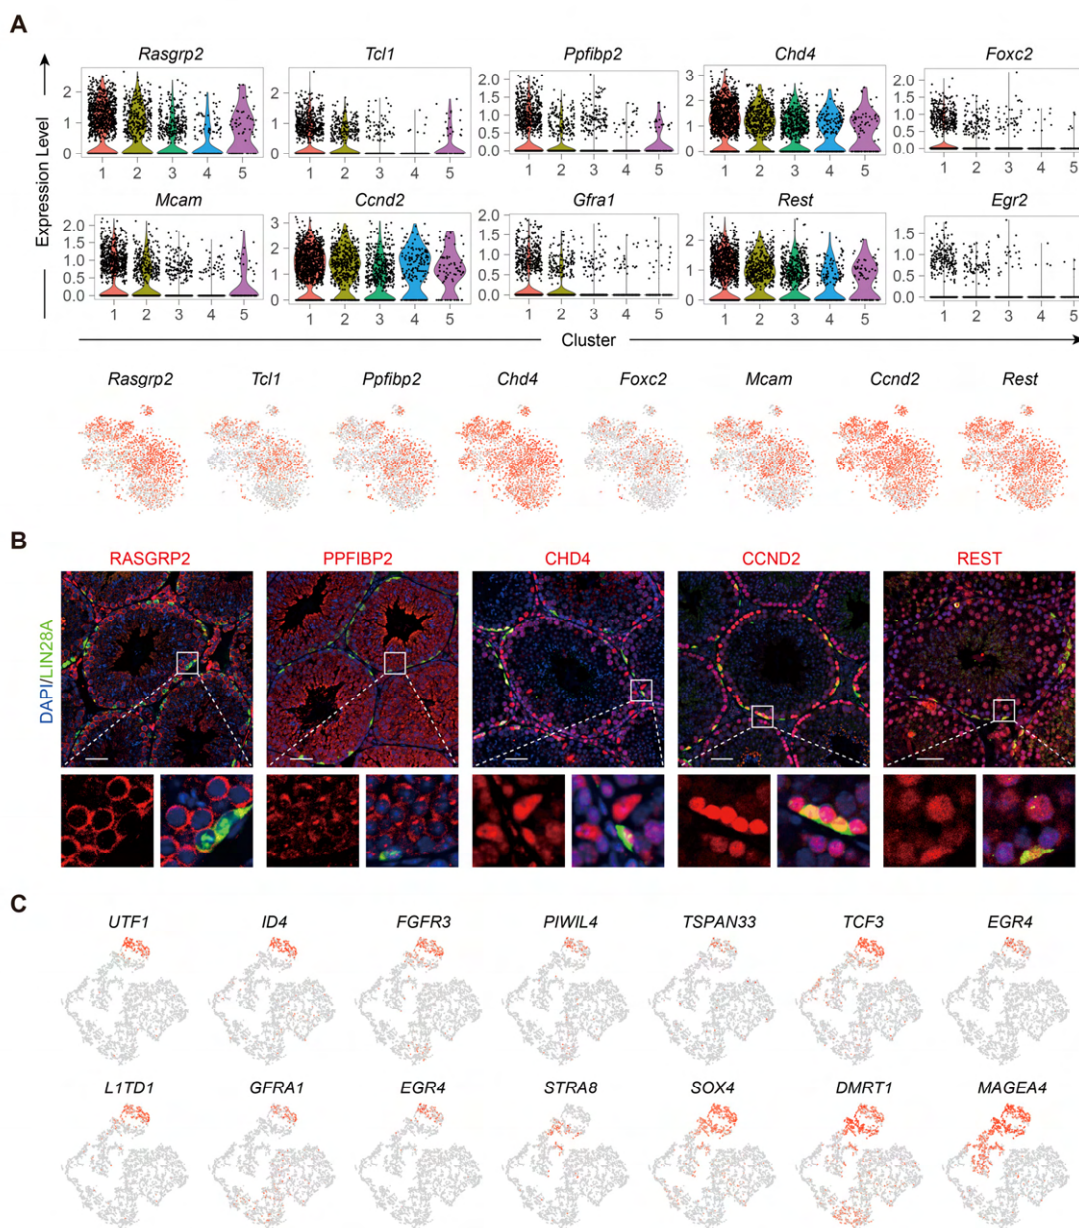

586  
587  
588  
589  
590  
591  
592

**Figure S2. Expression of top10 DEGs of Cluster1 in Figure 1B and classic SSC and SPG markers in adult human germ cells. (A)** Feature plots and violin plots of the Top10 DEGs of Cluster1. **(B)** Immunostainings for LIN28A (red), DAPI (blue), and newly-found markers (green) in testicular paraffin sections from adult mice. Scale bar, 50  $\mu$ m. **(C)** Feature plots showing the expression pattern of classic SSCs and SPG markers in adult human germ cells.

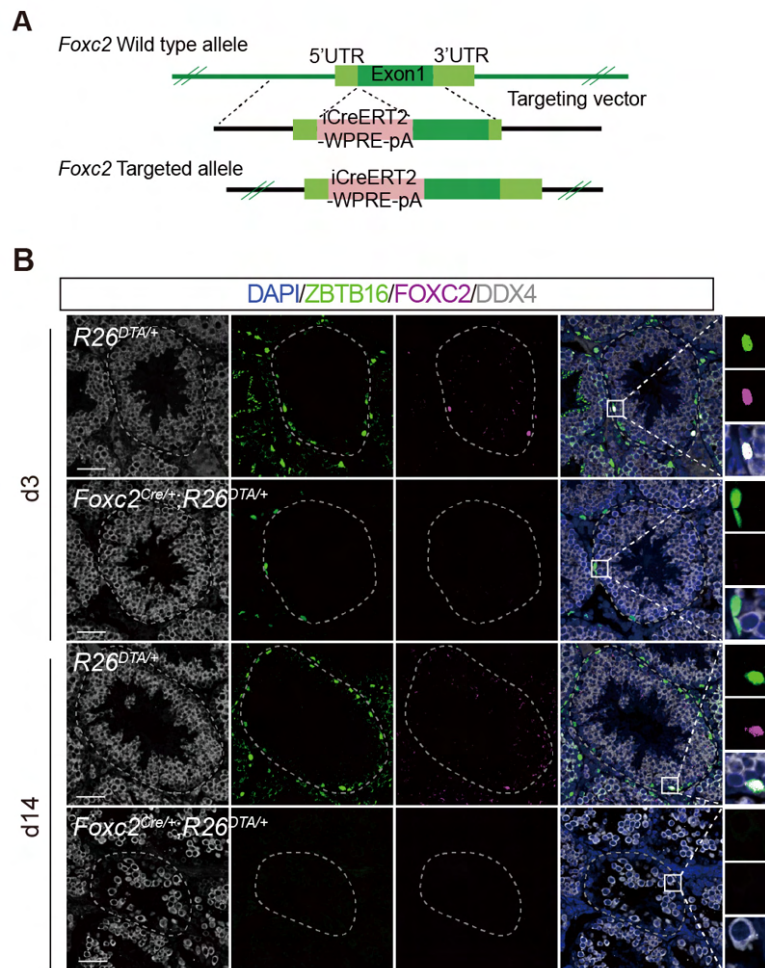

593  
594

595 **Figure S3. Construction of the *Foxc2<sup>iCreERT2</sup>* mice and depletion of uSPG pool in**  
596 ***Foxc2<sup>Cre/+</sup>;R26<sup>DTA/+</sup>* mice 14 days after specific ablation of FOXC2<sup>+</sup>-SSCs. (A) Construction of**  
597 **the *Foxc2<sup>iCreERT2</sup>* mice. (B) Immunostainings for DAPI (blue), DDX4 (white), ZBTB16 (green), and**  
598 **FOXC2 (magenta) at day 3 and day 14 post TAM induction in *Foxc2<sup>Cre/+</sup>;R26<sup>DTA/+</sup>* mice (scale bar,**  
599 **50  $\mu$ m).**



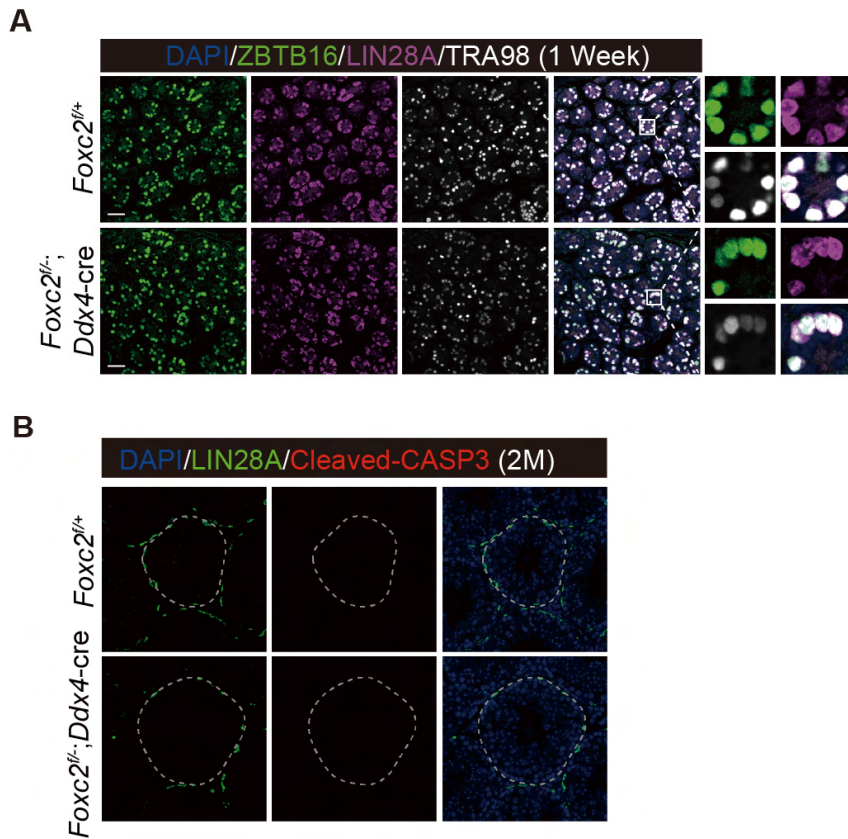

600

601

602

603

604

605

606

**Figure S4. Phenotypic validation of the *Foxc2<sup>fl/-</sup>;Ddx4-cre* mice.** (A) Immunostainings for DAPI (blue), ZBTB16 (green), LIN28A (magenta), and TRA98 (white) in seminiferous tubules of 1-week-old *Foxc2<sup>fl/+</sup>* and *Foxc2<sup>fl/-</sup>;Ddx4-cre* mice. Scale bar, 50  $\mu$ m. (B) Immunostainings for DAPI (blue), LIN28A (green), and Cleaved-CASP3 (red) in seminiferous tubules of the *Foxc2<sup>fl/+</sup>* and *Foxc2<sup>fl/-</sup>;Ddx4-cre* mice (2-month-old). M, month; scale bar, 50  $\mu$ m.

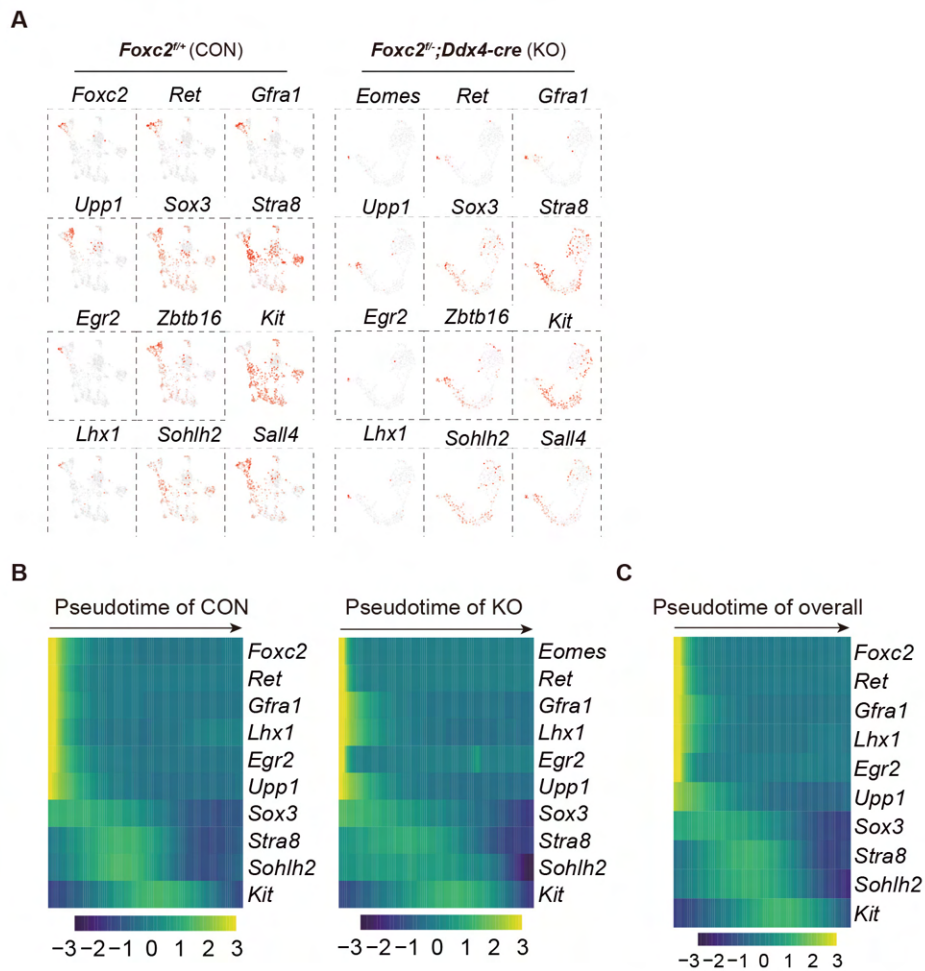

607  
608  
609  
610  
611  
612  
613

**Figure S5. scRNA-seq analysis of THY1<sup>+</sup> uSPG in adult *Foxc2<sup>fl/+</sup>* and *Foxc2<sup>fl/-</sup>;Ddx4-cre* mice.** (A) Feature plots of classic SPG markers for uSPG in adult *Foxc2<sup>fl/+</sup>* or *Foxc2<sup>fl/-</sup>;Ddx4-cre* mice. (B) Expression dynamics of SPG markers with pseudotime progression for uSPG from *Foxc2<sup>fl/+</sup>* or *Foxc2<sup>fl/-</sup>;Ddx4-cre* mice respectively. (C) Expression dynamics of SPG markers with pseudotime progression for overall uSPG from *Foxc2<sup>fl/+</sup>* and *Foxc2<sup>fl/-</sup>;Ddx4-cre* mice.

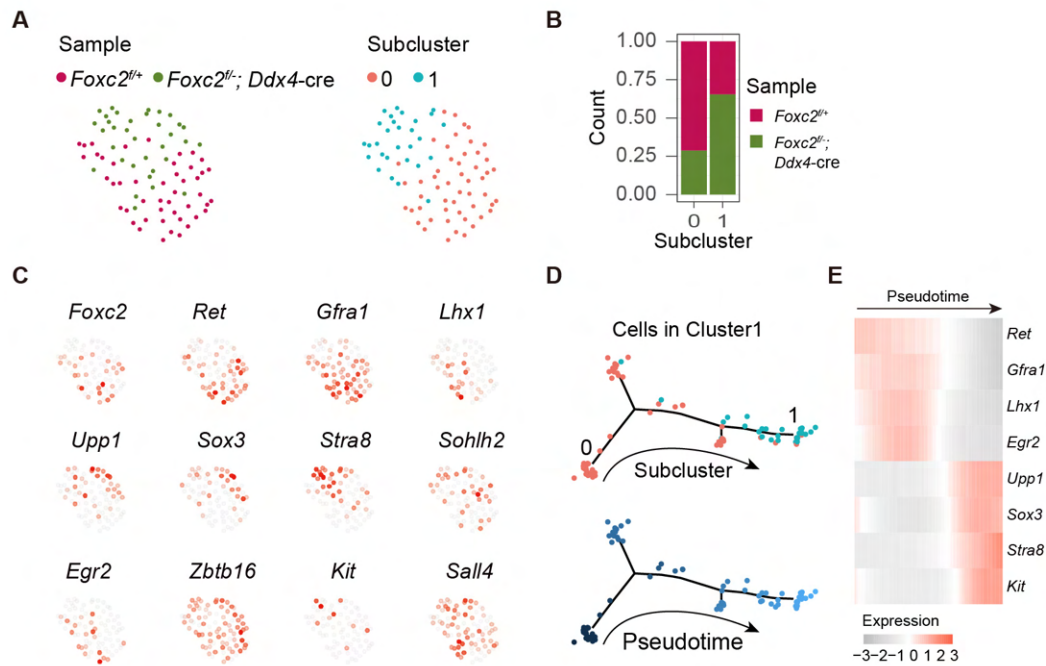

614  
615  
616  
617  
618  
619  
620  
621

**Figure S6. Re-cluster and developmental trajectory analysis of cells in Cluster1 derived from adult *Foxc2<sup>f/+</sup>* and *Foxc2<sup>f-/-</sup>;Ddx4-cre* mice.** (A) The t-SNE plot of the Cluster1 cells aggregated from the *Foxc2<sup>f/+</sup>* and *Foxc2<sup>f-/-</sup>;Ddx4-cre* mice colored by sample or subcluster. (B) The cell proportion of each sample in each subcluster. (C) Feature plots of SPG markers expression. (D) Developmental trajectory of the aggregated Cluster1 cells colored by subcluster or pseudotime. (E) Expression dynamics of SPG markers with pseudotime progression.

622 **Supplemental Tables (separate files)**

623

624 **Supplemental Table S1.** List of the top30 differentially expressed genes of different clusters.

625 **Supplemental Table S2.** List of the differentially expressed genes found by CUT&Tag sequencing  
626 and scRNA-seq respectively and their respective enriched Gene Ontology terms.

627 **Supplemental Table S3.** List of the Gene Ontology terms of the 306 crossed candidates.

628 **Supplemental Table S4.** Primers and antibodies used in this study.

## 629 Supplemental Materials and Methods

630

### 631 Mice

632 Animal experiments were approved by the Committee on Animal Care of the Institute of Basic  
633 Medical Sciences, Chinese Academy of Medical Sciences and Peking Union Medical College. The  
634 8-week-old C57BL/6J wild-type mice were used for magnetic-activated cell sorting. The  
635 Rosa26mTmG<sup>fllox</sup> mice (stock no. 007676), *Ddx4*-Cre mice (stock no. 000692) and EGFP<sup>Tg/+</sup> mice  
636 (stock no. 021930) were bought from the Jackson Laboratory. The *Foxc2*<sup>ICreERT2</sup> mice and the  
637 *Foxc2*<sup>fllox/fllox</sup> (*Foxc2*<sup>fl/fl</sup>) mice were constructed and bought from the Biocytogen. The Rosa-eGFP-  
638 DTA (R26<sup>DTA/+</sup>) mice were bought from GemPharmatech. All mice were housed and bred under  
639 specific pathogen-free conditions (temperature: 22-26°C, humidity: 40-55%, 12-h light/dark cycle)  
640 in the animal facility at the Institute of Basic Medical Sciences. DNA was isolated from the tails, and  
641 the genotypes of the mice were checked using PCR with specific primers (Supplemental Table S4).  
642 All mice were randomly assigned to experiments and no statistical methods were used to  
643 predetermine sample size. The person performing the experiments did not know the sample identity  
644 until after data analysis. No data were excluded from analyses and the data displayed included a  
645 minimum of three independent experiments and a minimum of three biological replicates for each  
646 independent experiment. The 8-week-old C57BL/6J WT mice were treated with busulfan (40  
647 mg/kg) and used as recipient mice 1 month later.

648

### 649 Magnetic-activated cell sorting (MACS)

650 The testes from 8-week-old C57BL/6J wild-type mice or 4-month-old *Foxc2*<sup>fl/+</sup> and *Foxc2*<sup>fl/-</sup>; *Ddx4*-  
651 cre mice (n=4) were minced and digested in the collagenase type IV (1mg/mL, Sigma) and DNase  
652 I (500µg/mL, Sigma) at 37°C for 15 min. The cell suspension was pipetted up and down once every  
653 5 minutes and the digestion process was stopped with DMEM (containing 10% FBS). The cell  
654 suspension was filtered through a 40-µm nylon mesh, and after centrifugation, the cells were  
655 resuspended in 8mL PBS. The 15 mL conical centrifuge tubes were slowly overlaid with 2 mL of  
656 70% Percoll solution, 2 mL of 30% Percoll solution, and then 2 mL of testicular cell suspension and  
657 centrifuge at 600 × g for 10 min at 4 °C without using the centrifuge brake. After centrifugation, the  
658 cells at the interface between the 70% and the 30% Percoll solution were carefully removed into  
659 the new conical centrifuge tubes, washed with PBS, and then centrifuge at 600 × g for 10 min at  
660 4 °C. After centrifugation, the cells were resuspended in 360µL MACS buffer, added with 40µL of  
661 magnetic microbeads conjugated with anti-Thy-1 antibody (Miltenyi Biotec 130-049-101, Auburn,  
662 CA), and mixed well. Incubate the cell suspension containing Thy-1 microbeads for 20 min at 4 °C.  
663 Mix gently by tapping every 10 min. Add 20 mL of MACS buffer to the tube to dilute Thy-1  
664 microbeads and centrifuge at 300 ×g for 10 min at 4 °C. Remove the supernatant completely and  
665 resuspend in 2 mL of MACS buffer. Place the separation columns (MS Column; Miltenyi Biotec  
666 130-042-201) in the magnetic field of the mini MACS Separation Unit (Miltenyi Biotec 130-142-102)  
667 and rinse with 0.5 mL of MACS buffer. Apply the cell suspension to the columns (500µL/ column).  
668 After the cell suspension has passed through the column and the column reservoir is empty, wash  
669 the column with 0.5mL of MACS buffer three times. Remove the column from the MACS Separation  
670 Unit and elute the magnetically retained cells slowly into a 50 mL conical centrifuge tube with 1mL  
671 of MACS buffer using the plunger supplied with the column. Centrifuge the tube containing the cells  
672 at 600 × g for 10 min at 4 °C and resuspend the cell pellet with 10mL of MACS buffer for rinsing.  
673 Repeat this step once. After the final rinsing step, resuspend cells in 0.04% BSA and count the cell  
674 number.

675

676 **Single-cell RNA-seq**

677 The MACS-sorted Thy1<sup>+</sup> cells were used for loading onto the Chromium Single Cell 3' Chip kit v2  
678 (10x Genomics, PN-120236) according to the instructions. Cell capturing and library preparation  
679 was performed following the kit instructions of the Chromium Single Cell 3' v2 Library and Gel Bead  
680 Kit (10x Genomics, PN-120237). In brief, 5000 cells were targeted for capture, and after cDNA  
681 synthesis, 10-12 cycles were used for library amplification. The libraries were then size-selected,  
682 pooled, and sequenced on a Novaseq 6000 (Illumina). Shallow sequencing was performed to  
683 access the library quality and to adjust the subsequent sequencing depth based on the capture  
684 rate and the detected unique molecular indices (UMI).

685

686 **Single-cell RNA-seq data processing**

687 Raw sequencing reads were processed using the Cell Ranger v.3.0.1 pipeline of the 10x Genomics  
688 platform. In brief, reads from each sample were demultiplexed and aligned to the mouse mm10  
689 genome, and UMI counts were quantified for each gene per cell to generate a gene-barcode matrix.  
690 Default parameters were used. The UMI counts were analyzed using the Seurat R Package (58)  
691 (v.3.0.1) following the Seurat pipeline. Cells with more than 200 detected genes or less than 10%  
692 mitochondria reads were retained. Genes not detected in at least 10 cells were removed from  
693 subsequent analysis. The resulting matrix was normalized, and the most variable genes were found  
694 using Seurat's default settings, then the matrix was scaled with regression against the mitochondria  
695 reads. The top 2000 variable genes were used to perform PCA, and Jackstraw was performed  
696 using Seurat's default settings. Variation in the cells was visualized by UMAP for the top principal  
697 components. Cell types were determined using marker genes identified from the literature (59). We  
698 used the Seurat function CellCycleScoring to determine the cell cycle phase, as this program  
699 determines the relative expression of a large set of G2-M and S-phase genes. After removing the  
700 undefined cells, the spermatogonia were used for trajectory analysis, and the single-cell  
701 pseudotime trajectory was constructed with the Monocle 2 package (v2.12.0) (60-62) according to  
702 the provided documentation. The Monocle function clusterCells was used to detect cell clusters  
703 between clusters. The Seurat function FindAllMarkers with default settings was used to find DEGs  
704 upregulated in each cluster compared to the other cells. The top200 DEGs of cluster1 were used  
705 for ordering cells, and the discriminative dimensionality reduction with trees (DDRTree) method  
706 was used to reduce the data to two dimensions. The dynamic expression patterns with the  
707 spermatogonial developmental trajectory of specific genes were visualized using the Monocle  
708 function plot\_genes\_in\_pseudotime and plot\_pseudotime\_heatmap. The procession data of the  
709 adult human single-cell dataset was downloaded from Gene Expression Omnibus (GEO):  
710 GSE112013 and the UMI counts were analyzed using the Seurat R Package (v.3.0.1) following the  
711 Seurat pipeline with the same parameters and functions as mentioned previously. According to the  
712 known markers, the germ cells characterized was used for trajectory analysis, and the single-cell  
713 pseudotime trajectory was constructed with the Monocle 2 package (v2.12.0) as mentioned  
714 previously.

715

716 **CUT & Tag sequencing and analysis**

717 CUT&Tag assay was performed using CUT&Tag 2.0 High-Sensitivity Kit (Novoprotein scientific  
718 Inc., Cat# N259-YH01). The detailed procedures were described in (40, 63). In brief, cells were  
719 harvested by trypsin and enriched by ConA-magnetic beads. 10,000 cells were re-suspended in  
720 100 mL Dig-wash Buffer (20 mM HEPES pH 7.5; 150 mM NaCl; 0.5 mM Spermidine; 13 Protease  
721 inhibitor cocktail; 0.05% Digitonin) containing 2 mM EDTA and a 1:100 dilution of primary FOXC2  
722 antibody. The primary antibody was incubated overnight at 4°C. Beads were washed in Dig-wash



723 Buffer 3 times and incubated with secondary antibody for 1 hour at a dilution of 1:200. After  
724 incubation, the beads were washed 3 times in Dig-Hisalt Buffer (0.05% Digitonin, 20 mM HEPES,  
725 pH 7.5, 300 mM NaCl, 0.5 mM Spermidine, 13 Protease inhibitor cocktail). Cells were incubated  
726 with proteinA-Tn5 transposome at 25°C for 1 h and washed 3 times in Dig-Hisalt buffer to remove  
727 unbound proteinA-Tn5. Next, cells were re-suspended in 100mL Tagmentation buffer (10 mM  
728 MgCl<sub>2</sub> in Dig-Hisalt Buffer) and incubated at 37°C for 1 h. The tagmentation was terminated by  
729 adding 2.25 mL of 0.5 M EDTA, 2.75 mL of 10% SDS and 0.5 mL of 20 mg/mL Proteinase K at  
730 55°C for 1 hour. The DNA fragments were extracted by phenol chloroform and used for sequencing  
731 on an Illumina HiSeq instrument (Illumina NovaSeq 6000) to generate 2 × 150-bp paired-end reads  
732 following the manufacturer's instructions.

733 Raw reads were analyzed by removing low-quality or adaptor sequences using Trim\_galore  
734 (v0.5.0) and cleaned reads were mapped to the reference genome mm10 using Bowtie2 (v2.2.5).  
735 We used MACS2 (v2.1.2) to call peaks found in different groups. Homer (v4.11.1) de novo motif  
736 discovery tool was used for finding the binding motifs of Foxc2 with the findMotifsGenome.pl  
737 command. The binding potential of candidate target genes at the binding motif was predicated  
738 using the JASPAR Scan function (binding potential >0.8). The peaks filtered by fold change more  
739 than 5 and transcription start site (TSS) less than 3000 bp were annotated by R package Chip  
740 Seeker for gene category analysis. R package Cluster profiler was used for gene function  
741 annotation such as KEGG and GO analysis.

742

#### 743 **Enrichment analyses**

744 Gene Ontology (GO) and KEGG pathway enrichment analyses were conducted using the  
745 ClusterProfiler package (v3.12.0) (Yu et al., 2012) and the ClueGO app (v2.5.7) in Cytoscape  
746 (v3.8.1) with default settings and a p-value cut-off of 0.05. GSEA enrichment analysis was  
747 assessed using the GSEA (v4.0.2) algorithm with MSigDB (v7.0) with default settings. The signaling  
748 pathways enriched by niche-derived paracrine factors and undifferentiated SPG-derived  
749 membrane proteins in the DEGs of the four samples were characterized. Then for each niche cell  
750 type, the niche-derived signaling pathways in all four samples were crossed with the SSC-derived  
751 signaling pathways to identify the candidate signaling pathways pivotal to SSCs maintenance.

752

#### 753 **Transplantation assay**

754 The 8-week-old C57BL/6J WT mice were treated with busulfan (40 mg/kg) and used as recipient  
755 mice 1 month later. SSCs were transplanted into the testis of recipient mice (1 × 10<sup>3</sup> cells/testis),  
756 and two months after transplantation, the testes were harvested and observed under a  
757 fluorescence microscope.

758

#### 759 **Fluorescence-activated cell sorting (FACS)**

760 Single-cell suspensions were generated from testes or *in vitro* cultured SSCs. FACS was performed  
761 using an SH800 machine (Sony Biotechnology) to isolate the GFP<sup>+</sup> cells. Briefly, the GFP<sup>+</sup> gating  
762 area was based on the point of the fluorescence intensity axis where cells were considered as  
763 being GFP<sup>+</sup>, set based on the background fluorescence intensity of a non-transgenic control testis  
764 cell population.

765

#### 766 **Immunofluorescence**

767 Mouse testes were fixed in 4% Paraformaldehyde (PFA) at 4°C overnight, dehydrated, embedded  
768 in paraffin, and cut into 5-µm thick sections. The rehydrated mouse or human testis sections were  
769 subjected to antigen retrieval, blocked in 5% BSA with 0.1% Triton X-100, and incubated with

770 primary antibody (Supplemental Table S4) at 4°C overnight, including the germ cell marker DDX4,  
771 undifferentiated spermatogonia markers ZBTB16, LIN28A, ECAD (64), GFRA1, EOMES, PAX7,  
772 progenitor marker NEUROG3, and spermatocyte marker SYCP3 (65). After three 5-min washes in  
773 PBS, the sections were incubated with secondary antibodies (Supplemental Table S4) and DAPI  
774 (Sigma) at 37°C for 1 h. After three 5-min washes in PBS, coverslips were then mounted on glass  
775 slides using anti-quencher fluorescence decay (Solarbio). Images were captured using a Zeiss 780  
776 laser-scanning confocal microscope. Whole-mount immunofluorescence of seminiferous tubules  
777 was performed as previously described (66). Briefly, seminiferous tubules were disentangled from  
778 testicular biopsies and immediately fixed in 4% PFA at 4°C for 12 h. After fixation, the seminiferous  
779 tubules were permeabilized with 0.5% Triton X-100 in PBS and treated with 5% BSA in PBS  
780 overnight at 4°C. After three 30-min washes, the seminiferous tubules were incubated with primary  
781 antibody (Supplemental Table S4) overnight at 4°C. After three 30-min washes, the seminiferous  
782 tubules were incubated with species-specific secondary antibodies and DAPI at 4°C for 12 h. After  
783 three 30-min washes, the seminiferous tubules were mounted on slides with anti-quencher  
784 fluorescence decay (Solarbio) and observed with a Zeiss 780 laser-scanning confocal microscope.  
785

#### 786 **RNA isolation and quantitative RT-PCR analysis**

787 Total RNA was extracted from the testes or cultured cells using the RNeasy kit (Qiagen), reverse-  
788 transcribed using RevertAid First Strand cDNA Synthesis kit (Thermo), and processed for qRT-  
789 PCR using PowerUp SYBR Green Master Mix (Applied Biosystems) and a LightCycler 480 system  
790 (Roche) with gene-specific primers (Supplemental Table S4). Reactions were run in triplicate and  
791 the mRNA levels were normalized to Gapdh and quantified using the delta-delta Ct method. The  
792 values shown are mean  $\pm$  s.e.m. from three biological replicates.  
793

#### 794 **Tamoxifen inducible**

795 According to a previous report for activation of iCre (9), the mice were fed with TD.130859 (TAM  
796 diet) for three days. The food was formulated for 400 mg tamoxifen citrate per kg diet, which would  
797 provide ~40 mg tamoxifen per kg body weight per day.

798 *Analyses of cyst length.* The cyst length was obtained according to the previous report (67). Briefly,  
799 to determine the cyst length, after immunofluorescence staining with anti-E-CAD antibody, the  
800 whole mount seminiferous tubule specimens were observed under a fluorescence microscope. The  
801 E-CAD staining coupled with staining for FOXC2 enabled us to reliably identify syncytial cysts of  
802 FOXC2<sup>+</sup> cells.  
803

#### 804 **Analyses of cell density**

805 The cell density was counted according to a previous report (68). Briefly, the densities of the  
806 ZBTB16<sup>+</sup>, GFRA1<sup>+</sup>, LIN28A<sup>+</sup>, or FOXC2<sup>+</sup> cells were measured on the seminiferous tubules with  
807 whole-mount staining, the numbers of which per 1000 Sertoli cells were determined.  
808

#### 809 **Sperm counts**

810 Total sperm counts were obtained according to the previous report (69). Briefly, epididymal caput  
811 and cauda were minced and incubated in prewarmed M16 medium (Sigma-Aldrich) at 37°C in air  
812 containing 5% CO<sub>2</sub> for 30 min to allow the sperm to swim out. Then, the sperm were diluted in  
813 water and counted using a hemocytometer.

814 **Histology, evaluation of degenerating tubules**

815 Testes of WT and mutant mice were fixed with PFA fixative and processed for paraffin-embedded  
816 section preparation (5  $\mu$ m thick) and hematoxylin and eosin staining, according to standard  
817 procedures. The percentage of degenerating seminiferous tubules was calculated based on the  
818 cross-sections of seminiferous tubules (n > 200) that appeared on one transverse section for each  
819 testis. In normal (WT) mouse testes, four generations of germ cells, each synchronously  
820 progressing through spermatogenesis, form cellular associations of fixed composition (called  
821 seminiferous epithelial stages). In the testes of Foxc2<sup>fllox/-</sup>; Ddx4-cre mice, a few tubule cross-  
822 sections lacked one or more out of the four germ cell layers, which was defined as “degenerative  
823 tubules” in this study.

824

825 **Statistical analysis**

826 All statistical analyses were performed using GraphPad Prism (v7.0). All experiments were  
827 repeated at least three times, and data for evaluated parameters are reported as mean  $\pm$  s.e.m.  
828 The p-values were obtained using two-tailed unpaired Student's t-tests or one-way ANOVA  
829 followed by Tukey test (ns represents p-value > 0.05, \* represents p-value < 0.05, \*\* represents p-  
830 value < 0.01, \*\*\* represents p-value < 0.001, and \*\*\*\* represents p-value < 0.0001).

831

832 **References for Supplemental Materials and Methods**

- 833 58. T. Stuart *et al.*, Comprehensive Integration of Single-Cell Data. *Cell* **177**, 1888-1902.e1821  
834 (2019).
- 835 59. M. S. Kowalczyk *et al.*, Single-cell RNA-seq reveals changes in cell cycle and differentiation  
836 programs upon aging of hematopoietic stem cells. *Genome Res* **25**, 1860-1872 (2015).
- 837 60. X. Qiu *et al.*, Reversed graph embedding resolves complex single-cell trajectories. *Nat*  
838 *Methods* **14**, 979-982 (2017).
- 839 61. X. Qiu *et al.*, Single-cell mRNA quantification and differential analysis with Census. *Nat*  
840 *Methods* **14**, 309-315 (2017).
- 841 62. C. Trapnell *et al.*, The dynamics and regulators of cell fate decisions are revealed by  
842 pseudotemporal ordering of single cells. *Nat Biotechnol* **32**, 381-386 (2014).
- 843 63. X. Wang *et al.*, N(6)-methyladenosine modification of MALAT1 promotes metastasis via  
844 reshaping nuclear speckles. *Dev Cell* **56**, 702-715 e708 (2021).
- 845 64. M. Tokuda, Y. Kadokawa, H. Kurahashi, T. Marunouchi, CDH1 is a specific marker for  
846 undifferentiated spermatogonia in mouse testes. *Biol Reprod* **76**, 130-141 (2007).
- 847 65. L. Yuan *et al.*, The murine SCP3 gene is required for synaptonemal complex assembly,  
848 chromosome synapsis, and male fertility. *Mol Cell* **5**, 73-83 (2000).
- 849 66. S. Di Persio *et al.*, Spermatogonial kinetics in humans. *Development* **144**, 3430-3439 (2017).
- 850 67. T. Nakagawa, M. Sharma, Y. Nabeshima, R. E. Braun, S. Yoshida, Functional hierarchy and  
851 reversibility within the murine spermatogenic stem cell compartment. *Science* **328**, 62-67  
852 (2010).
- 853 68. R. A. Tegelenbosch, D. G. de Rooij, A quantitative study of spermatogonial multiplication  
854 and stem cell renewal in the C3H/101 F1 hybrid mouse. *Mutat Res* **290**, 193-200 (1993).
- 855 69. A. Roy, Y. N. Lin, J. E. Agno, F. J. DeMayo, M. M. Matzuk, Absence of tektin 4 causes  
856 asthenozoospermia and subfertility in male mice. *Faseb j* **21**, 1013-1025 (2007).

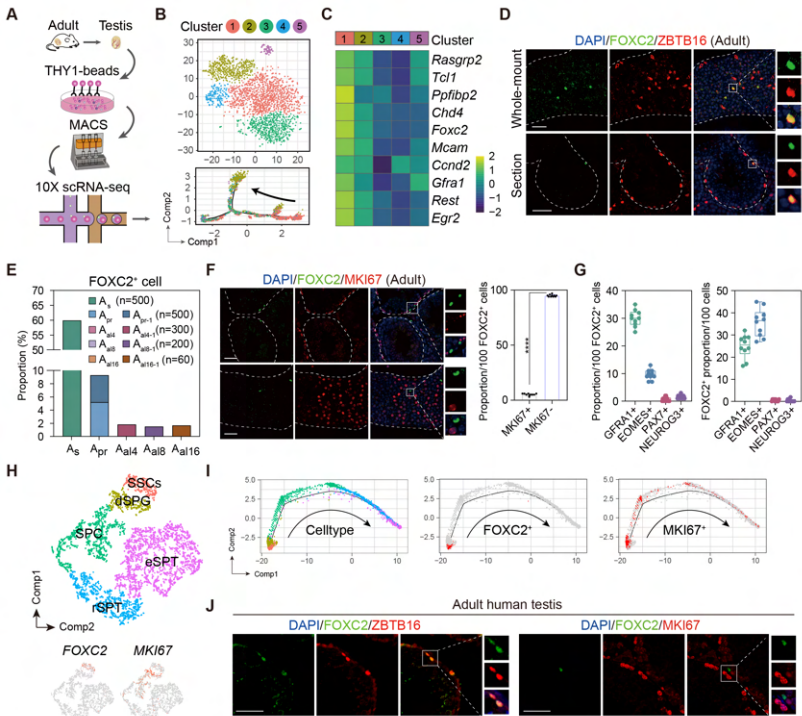



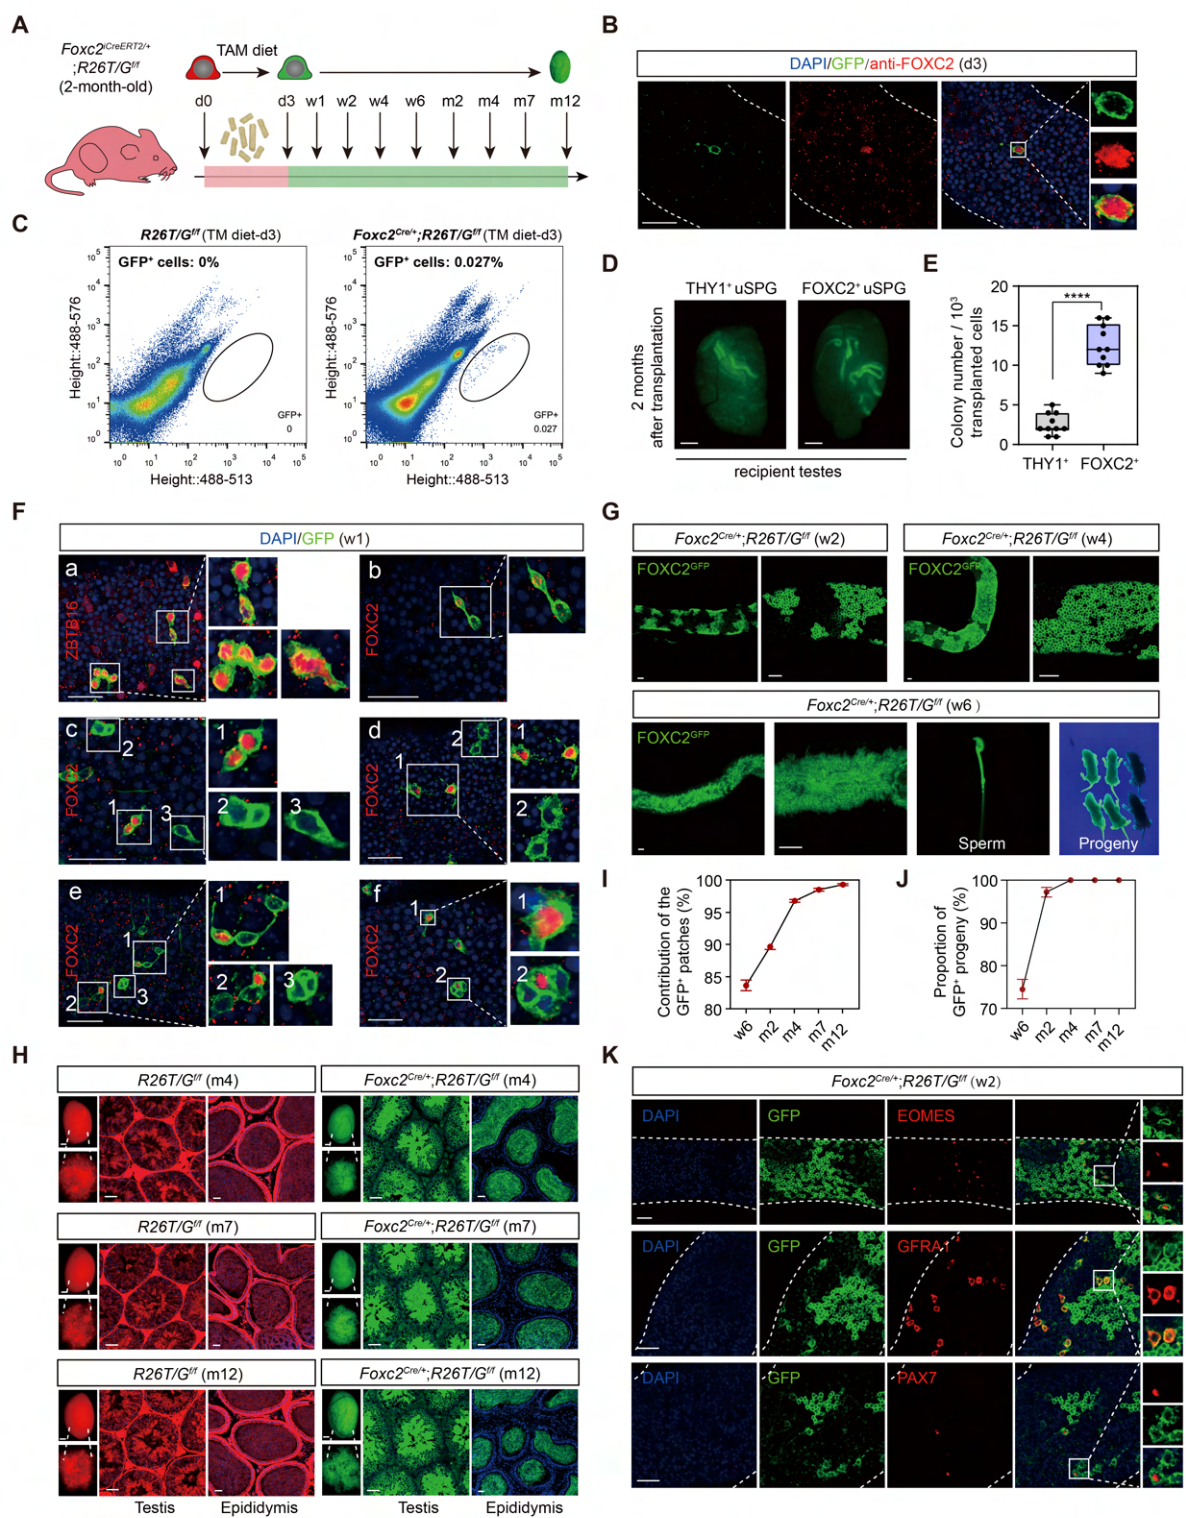

**A**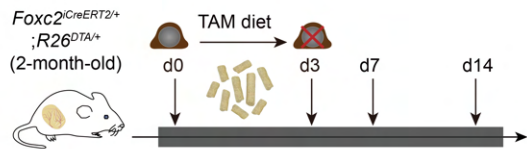**C**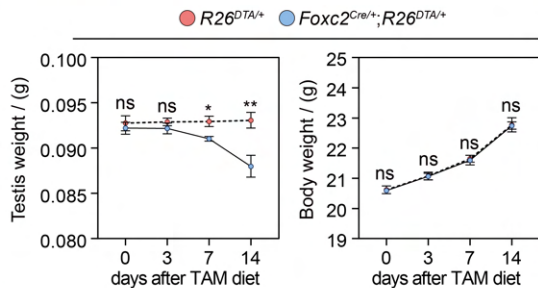**E**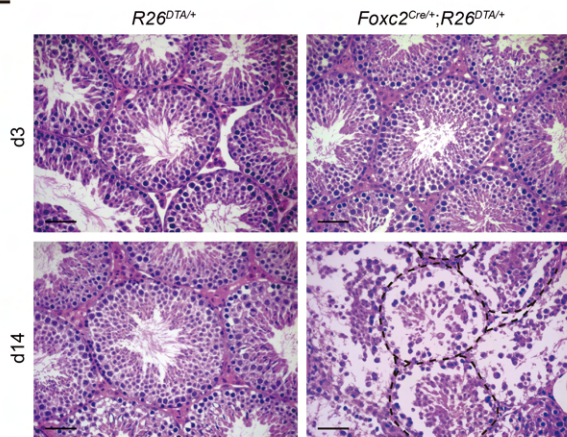**B**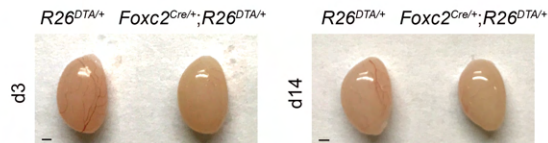**D**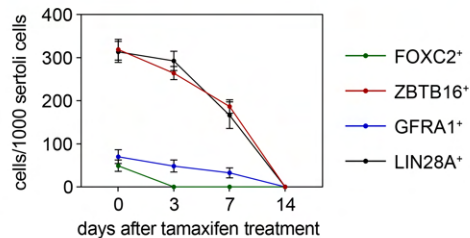**F**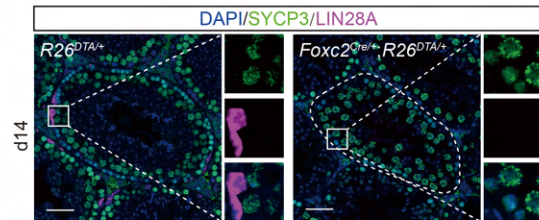**G**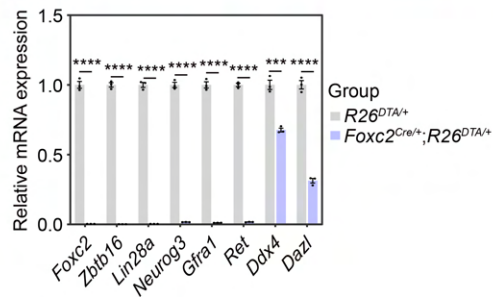

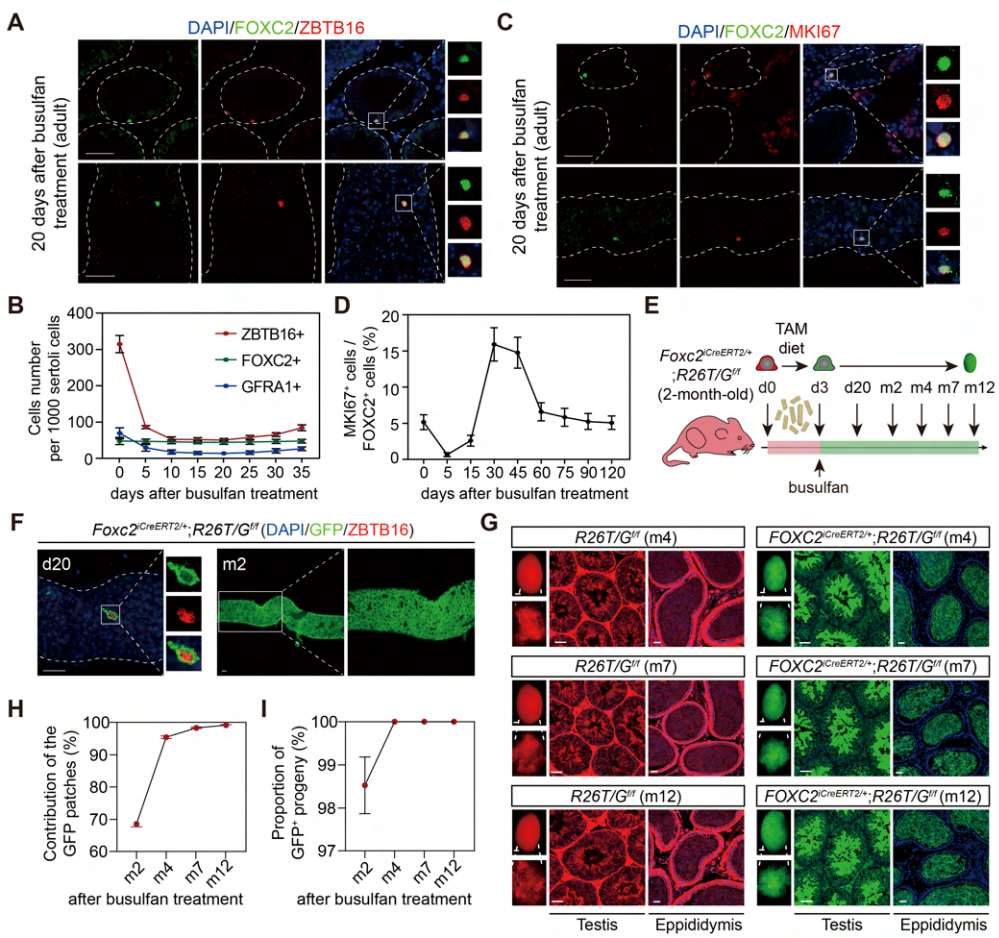







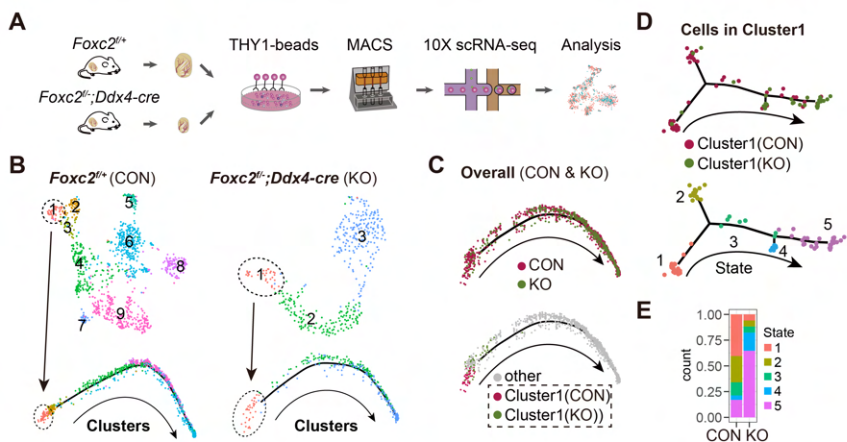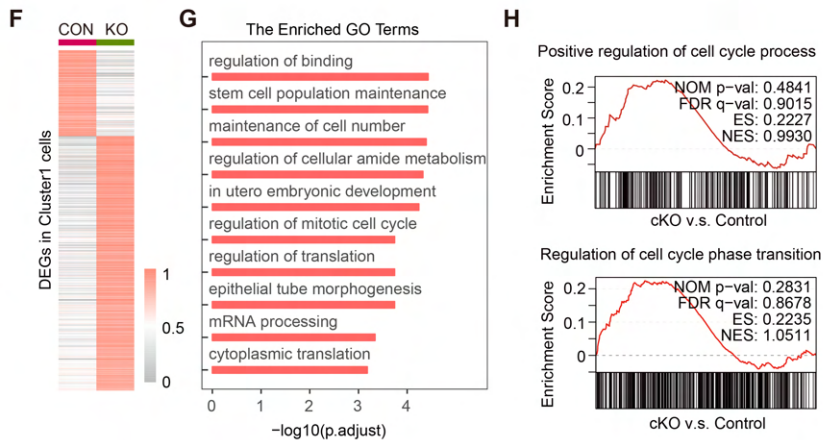

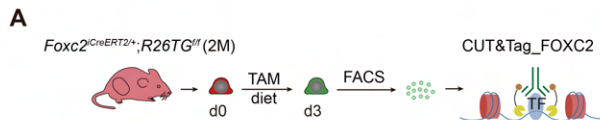

**B** Cut & Tag peaks enriched by FOXC2-antibody from FACS-sorted *Foxc2*<sup>GFP</sup> cells

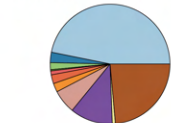

Peak enriched region

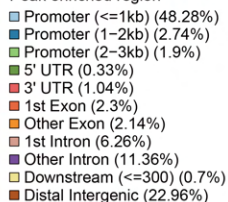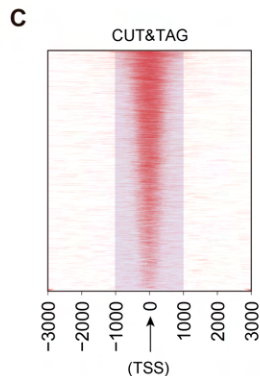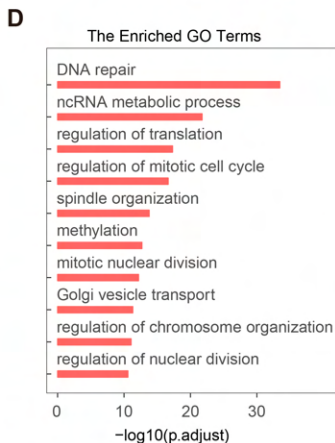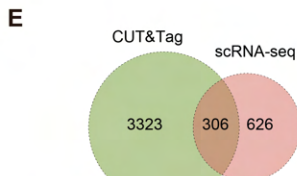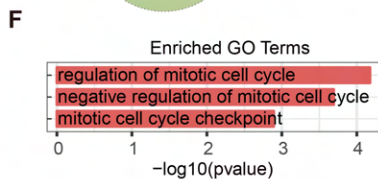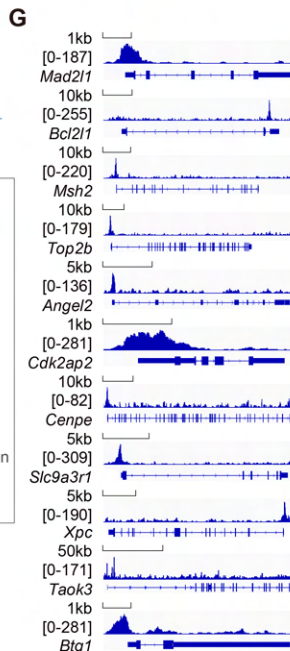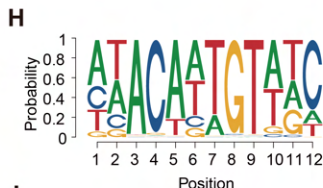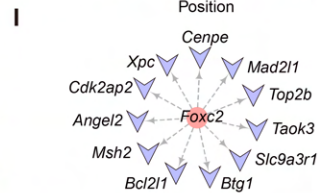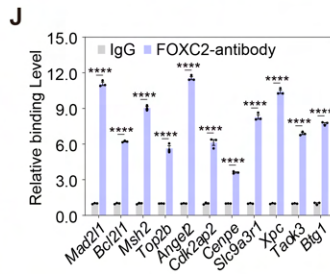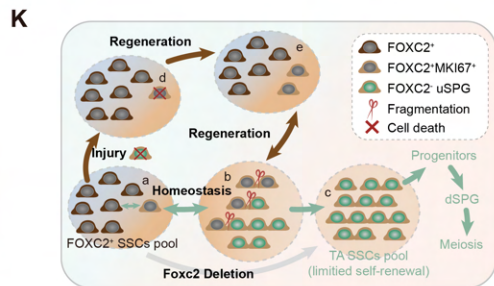

**A**MACS selected THY1<sup>+</sup> cells (DAPI/THY1/ZBTB16)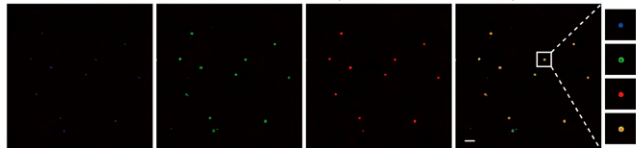**B**MACS selected THY1<sup>+</sup> cells
 THY1<sup>-</sup>
 THY1<sup>+</sup>
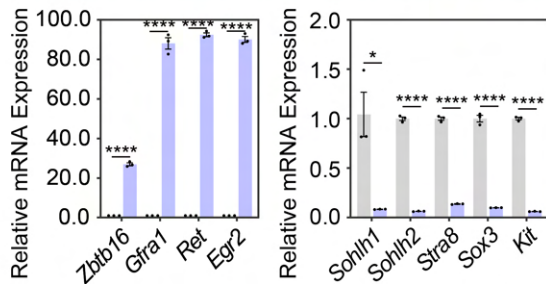**C**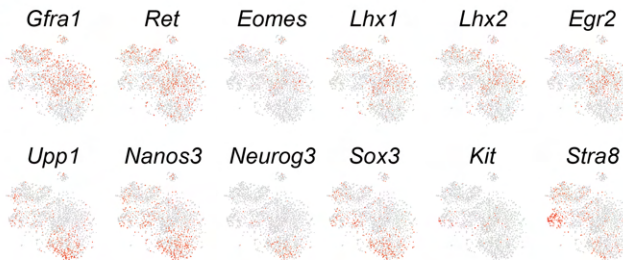**D**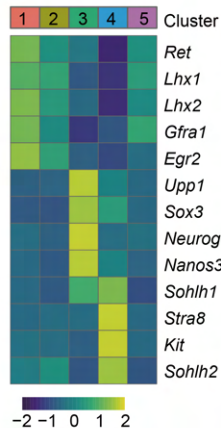**E**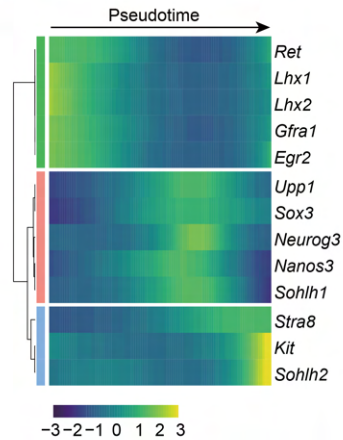**F**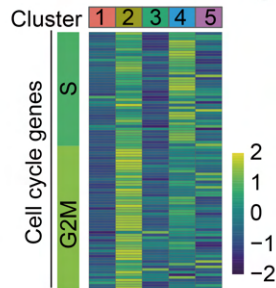**G**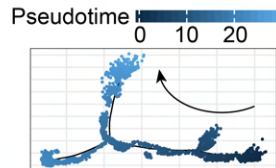

**A**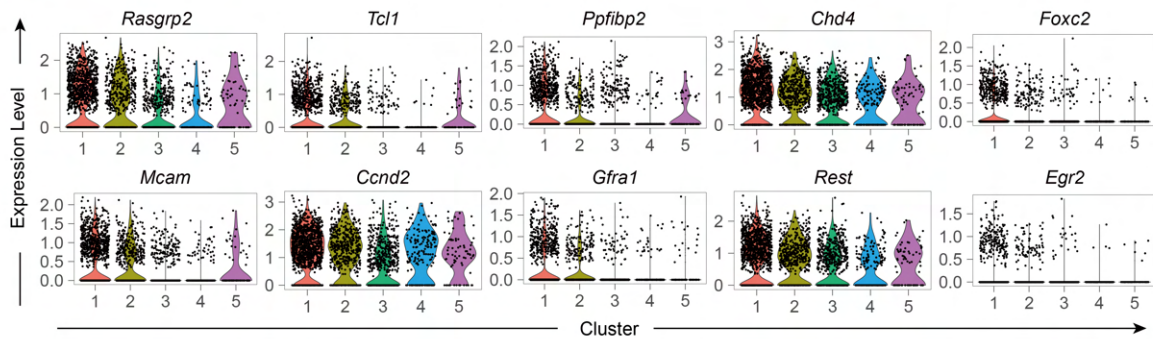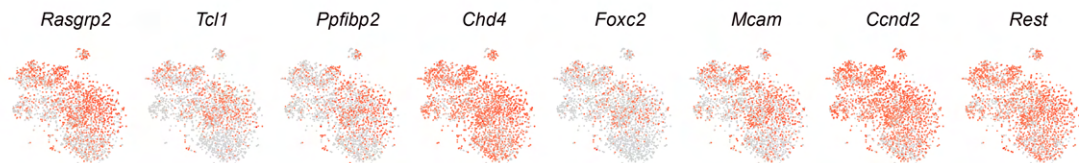**B**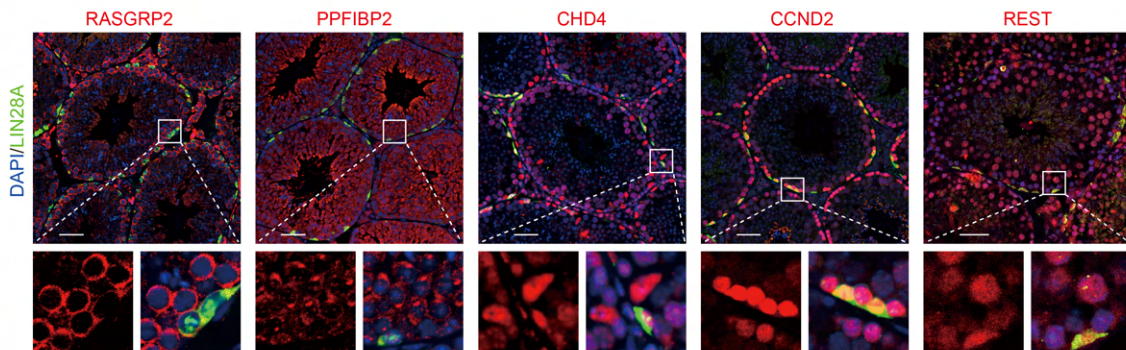**C**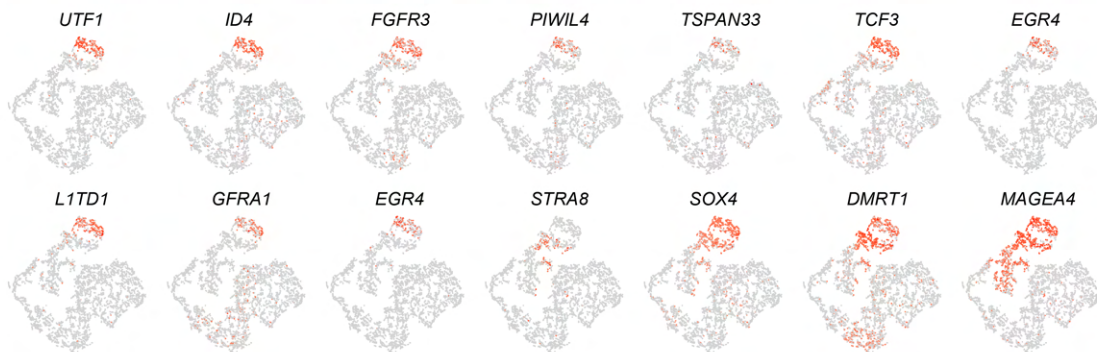



**A**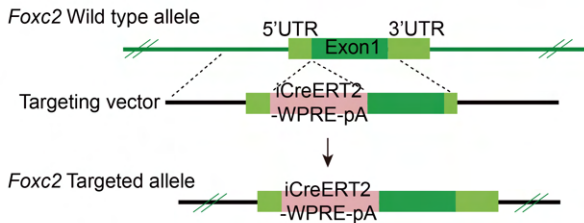**B**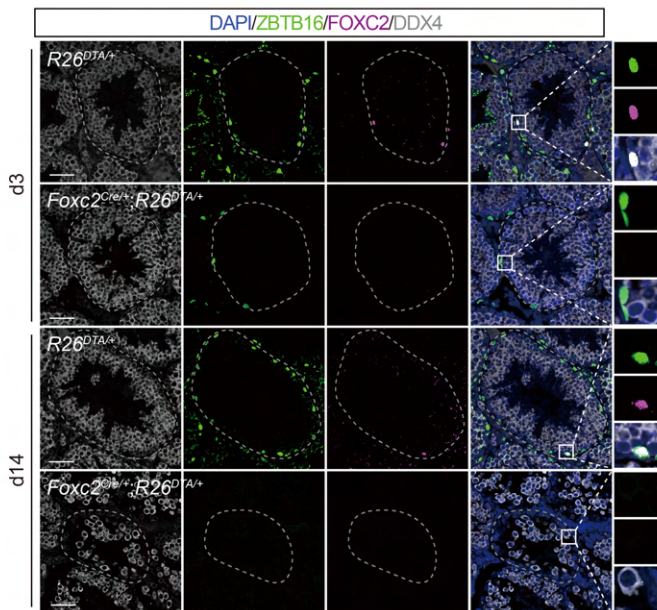

**A**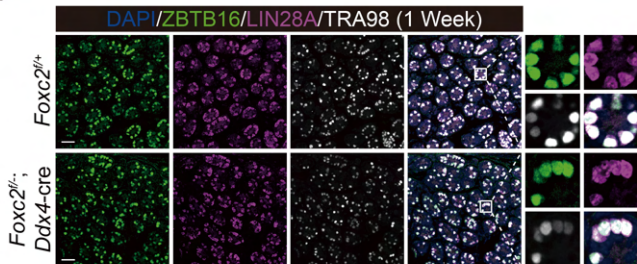**B**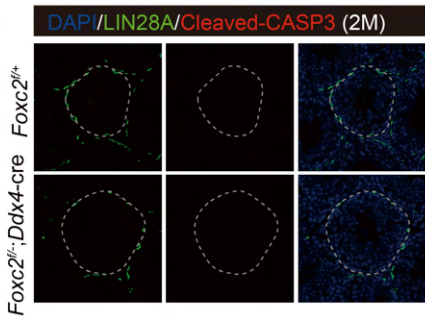

**A**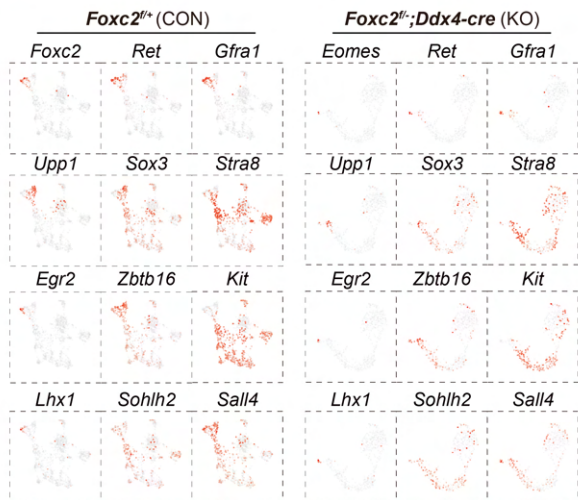**B**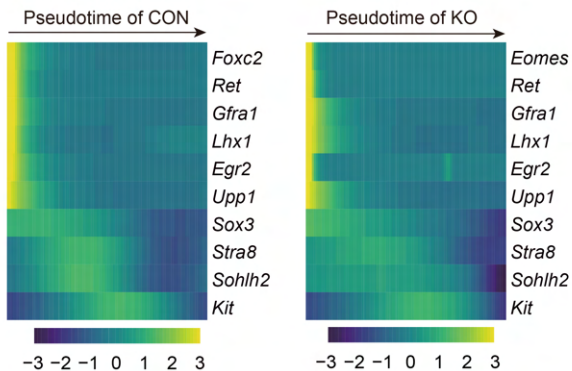**C**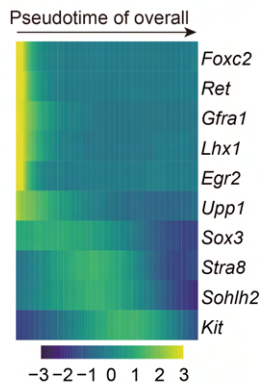

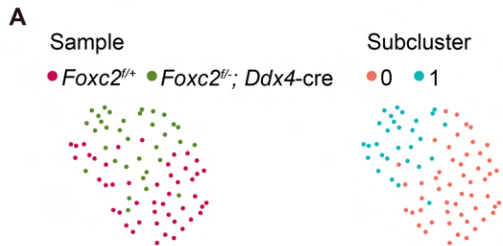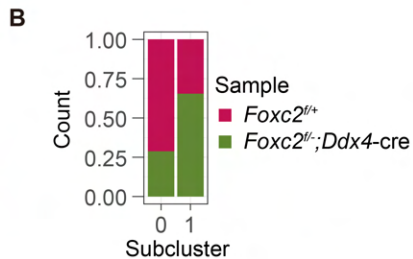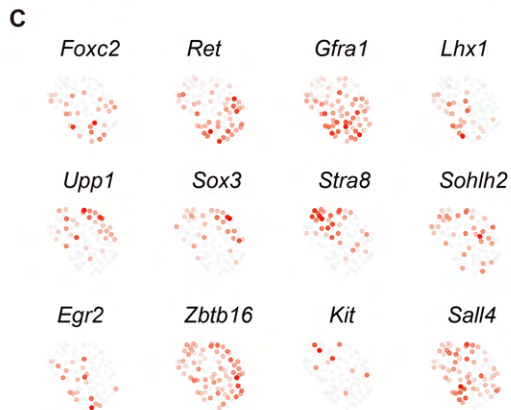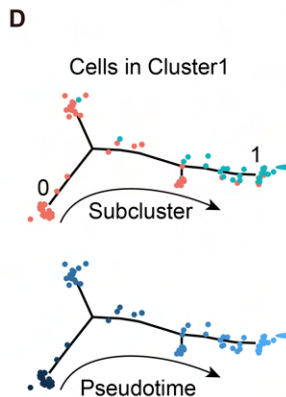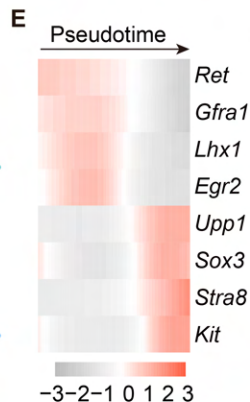

Source: https://www.biorxiv.org/content/10.1101/2022.12.20.521179v1.full.pdf
